# Supplementary material for: A Fast and Scalable Heuristic for the Solution of Large-Scale Capacitated Vehicle Routing Problems
Source: Atypon-hosted journal article supplement (doi:10.1287/trsc.2021.1059), 2021-06-30
Supplement: trsc.2021.1059.sm1.pdf [file trsc.2021.1059.sm1.pdf]

## Appendix A: Algorithmic Components Analysis: Additional Material

This section contains additional material related to the Algorithmic Components Analysis Section.

### A.1. Initial Solution Definition

Consider the scenario depicted in Figure 1, showing a single run for instance X-n936-k136. This example illustrates the evolution of the route minimization procedure with  $\Delta_{RM} = 1000$  on the left and of the core optimization procedure with  $\Delta_{CO} = 5000$  on the right. Both procedures ran for about three seconds and were applied to the same starting solution generated by the construction phase. By moving into the infeasible space, the route minimization procedure is very effective in quickly improving and compacting trivially bad initial solutions. However, since its structure is specifically designed to reduce the number of routes, the improvements vanish after a few hundred iterations.

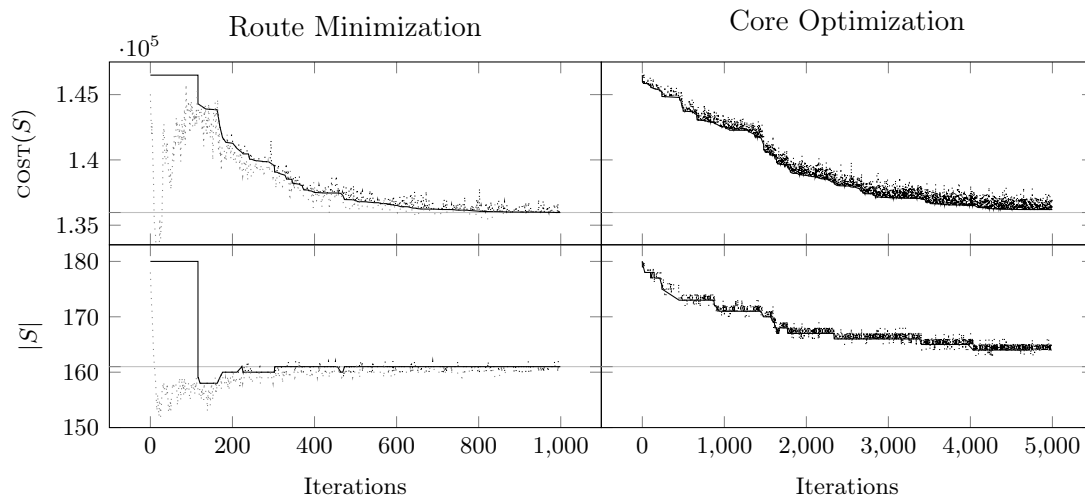

**Figure 1** Example of improvement procedures evolution when applied to the same initial solution for instance X-n936-k151. The continuous line shows the cost (top) and number of routes (bottom) associated with the best solution (in terms of cost) found up to that iteration; dots represents the current search trajectory. Gray and black dots are associated with infeasible and feasible solutions, respectively.

### A.2. Local Search

Figure 2 shows, for each local search operator applied to a shaken solution, the gap improvement when successfully applied, the application time in  $10^{-6}$  seconds, and the success ratio computed as the number of improving applications over the total number of attempts. Similarly, Figure 3 shows the effect of EJCH( $\cdot$ ) when applied to solutions that are already a local optimum for the first HRVND tier.

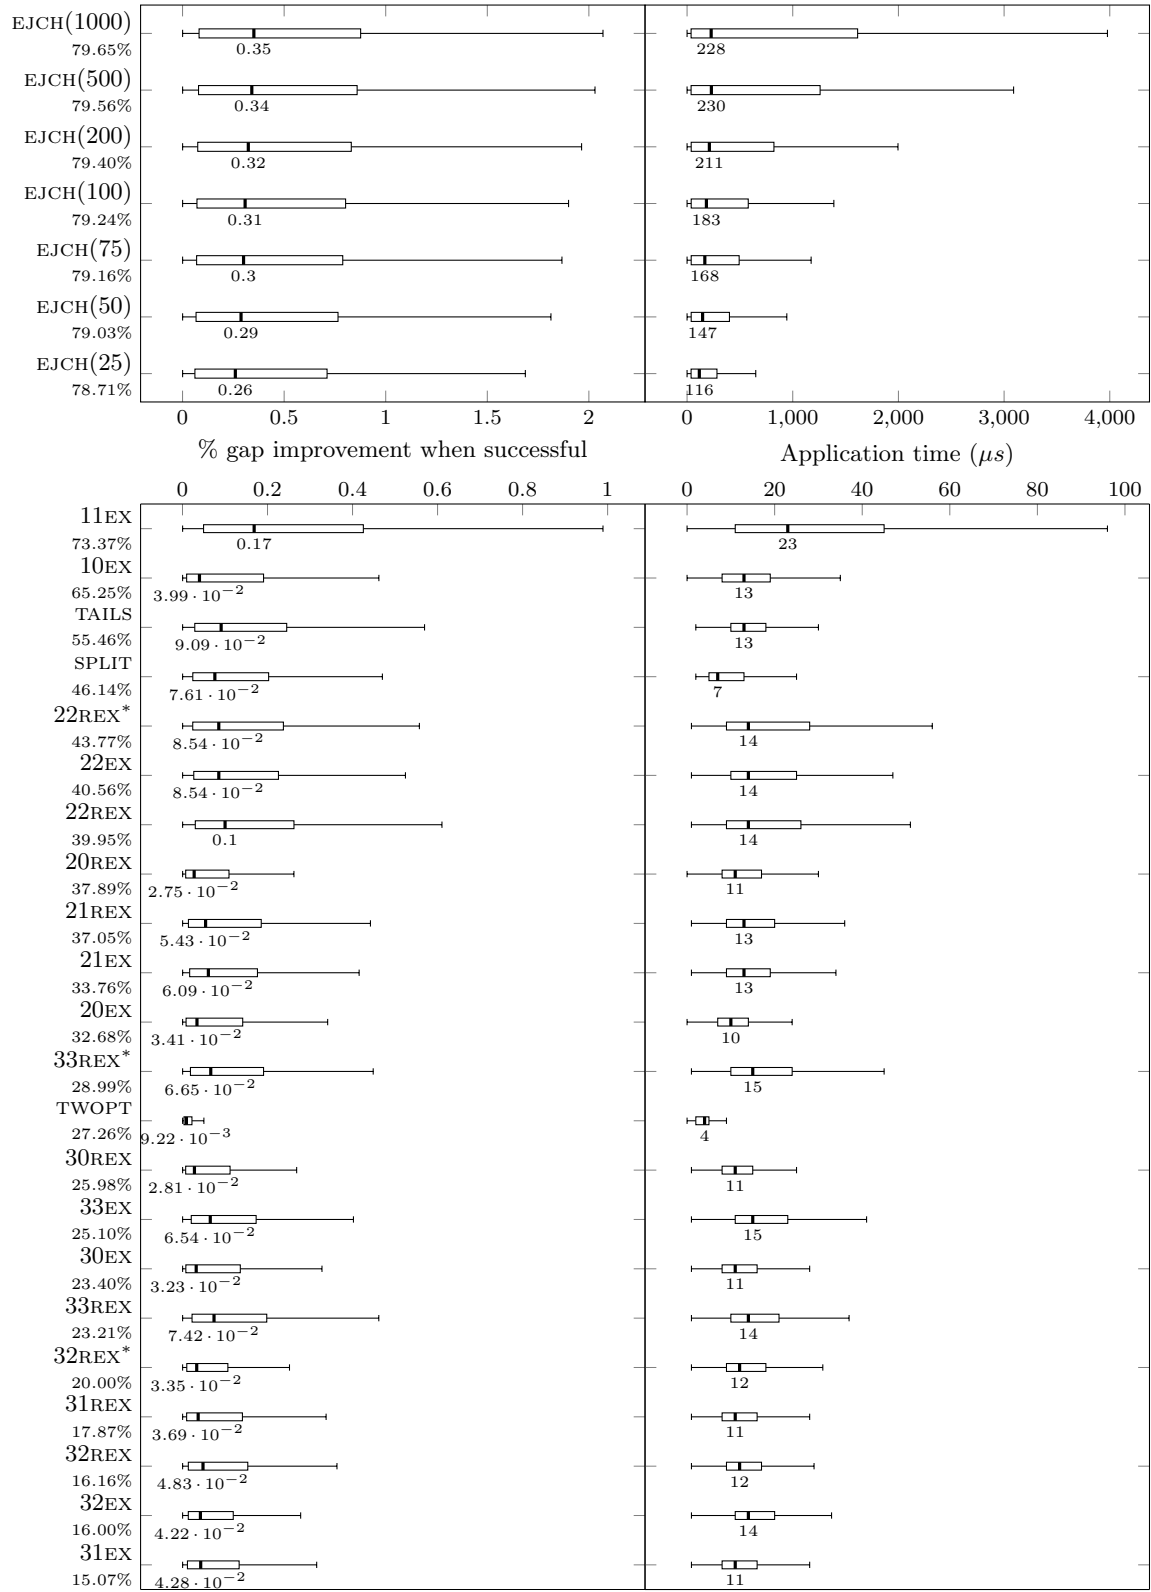

Figure 2 Statistics for local search operators when applied to shaken solutions. For each operator, we report the expected gap improvement when successfully applied (left), the total exploration time (right), and the success ratio (below each operator's name). The median value is shown below each boxplot.

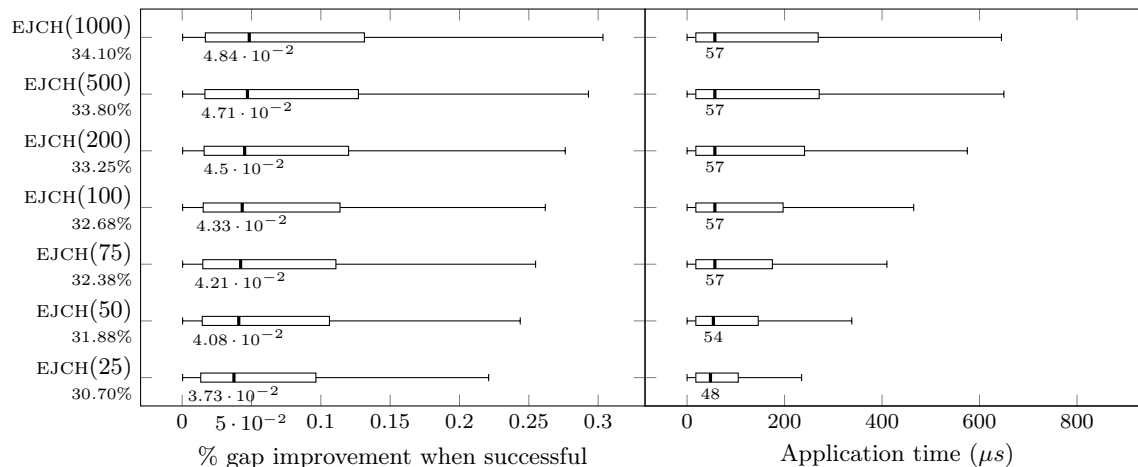

**Figure 3** Statistics for local search operators when applied to HRVND first tier local optima. For each operator, we report the expected gap improvement when successfully applied (left), the total exploration time (right), and the success ratio (below each operator’s name). The median value is shown below each boxplot.

### A.3. Extreme Runs

Table 1 shows the results we obtained by setting  $\Delta_{CO} = 10^7$ .

### A.4. Computations with Limited Memory Footprint

Random access memory (RAM) is relatively cheap nowadays, and large amounts are easily supported, even by low-cost laptops. Time, on the other hand, is much more valuable; new chips are moving to massive parallelization rather than an increase in their working frequency. Solution methods, however, seldom make use of parallel processing to solve a single instance, even though this approach might be a very interesting, yet challenging, research direction for very large-scale instances. We can thus state that the real bottleneck is probably not the amount of available RAM, but the computing time used to solve an instance. Indeed, the largest instance we considered, F2 from the  $\mathbb{B}$  dataset, with thirty thousand vertices, can be easily processed on a laptop with 16GB of RAM. During the main core optimization procedure, only about 66% of the available RAM would be used. Despite the fact that RAM is not currently a limiting factor, in this section we investigate the behavior of FILO when the cost matrix, which is one of the most RAM-consuming data structures we use, is not stored but, instead, arc costs are computed on demand. In this case, the computing time increases by about 52% (i.e., from 1.72 minutes to 2.60 minutes). As an example, without storing the cost matrix, the F2 instance’s RAM requirements drop from 10.56 GB to 3.68GB. This may allow the algorithm to be applicable to instances even larger than the one we considered. An alternative, more sophisticated, method proposed in Arnold, Gendreau, and Sørensen (2019), consists of storing a number of arcs connecting close vertices that are supposed to be used more frequently than others, in a hashmap.

**Table 1** Long computations on large-sized  $\mathbb{X}$  instances.

| ID          | BKS    | Best  | Avg  | Worst | $t$    |
|-------------|--------|-------|------|-------|--------|
| X-n502-k39  | 69226  | 0.00  | 0.01 | 0.04  | 262.65 |
| X-n513-k21  | 24201  | 0.00  | 0.07 | 0.16  | 222.27 |
| X-n524-k153 | 154593 | 0.01  | 0.14 | 0.27  | 146.99 |
| X-n536-k96  | 94868  | 0.50  | 0.60 | 0.71  | 161.76 |
| X-n548-k50  | 86700  | 0.01  | 0.02 | 0.09  | 207.85 |
| X-n561-k42  | 42717  | 0.08  | 0.20 | 0.28  | 138.73 |
| X-n573-k30  | 50673  | 0.12  | 0.22 | 0.26  | 205.74 |
| X-n586-k159 | 190316 | 0.20  | 0.25 | 0.31  | 181.93 |
| X-n599-k92  | 108451 | 0.15  | 0.22 | 0.33  | 189.87 |
| X-n613-k62  | 59545  | 0.12  | 0.20 | 0.39  | 121.34 |
| X-n627-k43  | 62173  | 0.03  | 0.12 | 0.32  | 198.31 |
| X-n641-k35  | 63705  | 0.05  | 0.11 | 0.18  | 206.51 |
| X-n655-k131 | 106780 | 0.00  | 0.02 | 0.03  | 378.73 |
| X-n670-k130 | 146332 | 0.50  | 0.64 | 0.90  | 136.33 |
| X-n685-k75  | 68225  | 0.17  | 0.34 | 0.52  | 142.94 |
| X-n701-k44  | 81923  | 0.03  | 0.11 | 0.35  | 163.87 |
| X-n716-k35  | 43387  | 0.09  | 0.16 | 0.29  | 176.98 |
| X-n733-k159 | 136190 | 0.06  | 0.13 | 0.20  | 135.04 |
| X-n749-k98  | 77314  | 0.15  | 0.25 | 0.38  | 141.90 |
| X-n766-k71  | 114456 | 0.16  | 0.27 | 0.34  | 156.24 |
| X-n783-k48  | 72394  | 0.10  | 0.17 | 0.26  | 191.01 |
| X-n801-k40  | 73331  | -0.03 | 0.09 | 0.15  | 188.16 |
| X-n819-k171 | 158121 | 0.39  | 0.44 | 0.53  | 141.35 |
| X-n837-k142 | 193737 | 0.12  | 0.21 | 0.26  | 191.22 |
| X-n856-k95  | 88990  | 0.01  | 0.07 | 0.13  | 188.52 |
| X-n876-k59  | 99303  | 0.11  | 0.16 | 0.24  | 176.58 |
| X-n895-k37  | 53928  | -0.04 | 0.13 | 0.31  | 189.72 |
| X-n916-k207 | 329179 | 0.19  | 0.23 | 0.31  | 200.72 |
| X-n936-k151 | 132812 | 0.16  | 0.26 | 0.38  | 127.16 |
| X-n957-k87  | 85469  | -0.00 | 0.06 | 0.11  | 195.38 |
| X-n979-k58  | 118988 | 0.05  | 0.16 | 0.24  | 244.49 |
| X-n1001-k43 | 72369  | 0.06  | 0.17 | 0.27  | 169.54 |
| Mean        |        | 0.11  | 0.19 | 0.30  | 183.74 |

New best solutions: (X-n801-k40, 73311);(X-n895-k37, 53906);(X-n957-k87, 85467).

## Appendix B: Move Generators and Static Move Descriptors

Efficiently managing move generators is crucial for any local search-based algorithm making use of GNs. In addition, flexibility might be required when experimenting different sparsification rules and composition of them, as we did in the analysis proposed in Section 4.4. In the following sections, we first discuss a flexible but still efficient implementation of move generators for the symmetric CVRP, supporting the union of different sparsification rules and a vertex-wise dynamic management. Then, we show how it can be used to efficiently implement SMD-based local search operators.

### B.1. Move Generators: Storage and Management

Given a set  $R$  of sparsification rules, the complete set of move generators  $T$  is defined by the union of a number of move generator sets  $T_r$ , each one defined by a sparsification rule  $r \in R$ ; that is,  $T = \bigcup_{r \in R} T_r$ . Each set  $T_r$  may be filtered according to a sparsification vector  $\gamma = (\gamma_0, \gamma_1, \dots, \gamma_N)$  defining, for each vertex  $i \in V$ , a percentage  $\gamma_i \in [0, 1]$  of move generators in  $T_r$  to be considered as active. More precisely, the dynamic set of move generators  $T_r^\gamma$  filtered according to  $\gamma$  is defined as  $T_r^\gamma = \bigcup_{i \in V} \{(i, j), (j, i) : j \in V \wedge \text{CONDITION}(i, j, \gamma_i)\}$ , where  $\text{CONDITION}(i, j, \gamma_i)$  is a criterion that determines whether  $(i, j)$  and  $(j, i)$  are active based on the value of  $\gamma_i$ .

In the following, we describe a possible implementation of the above defined general framework for move generators. An illustrative example, representing the implementation of a set of move generators  $T$  defined by the union of two sparsification rules  $r_0$  and  $r_1$ , is shown in Figure 4.

A list of move generators  $L(T)$  is built by considering unique move generators defined by the different sparsification rules  $r \in R$ . By denoting with  $L(T)_\ell$  the move generator  $(i, j)_\ell$  indexed by  $\ell$  in  $L(T)$ , we structured the list  $L(T)$  so as to satisfy:

1.  $L(T)_\ell = (i, j)_\ell \wedge L(T)_{\ell+1} = (j, i)_{\ell+1}$  for each even index  $\ell$ ;
2.  $L(T) \not\ni (i, i), \forall i \in V$ .

Condition 1 asks that both  $(i, j)$  and  $(j, i)$  are considered. This ensures the evaluation of a consistent set of moves when exploring asymmetric neighborhoods. Moreover,  $(i, j)$  and  $(j, i)$  are stored contiguously into  $L(T)$  so that given a move generator indexed by  $\ell$ , its reversed counterpart can be efficiently retrieved, when necessary. Finally, Condition 2 discards self-moves which are typically not used in local search procedures.

A number of lists  $L(T_r, v)$ , one for each vertex  $v \in V$ , is associated with each sparsification rule  $r \in R$ . Those lists identify a portion of  $L(T)$  consisting of move generators  $(i, j) \in T_r$ . In particular, each list  $L(T_r, v)$  keeps track of the even indices  $\ell$  of move generators  $(i, j)_\ell$  such that  $v = i$  or  $v = j$ . Because of Condition 1 on  $L(T)$ , it is not necessary to store the index of the counterpart of  $(i, j)$  that can be found accessing  $L(T)_{\ell+1}$ .

In addition, each list  $L(T_r, i)$ , along with indices  $\ell$ , stores an inclusion percentage value  $p_{ri\ell}$  used to define whether move generators  $(i, j)_\ell$  and  $(j, i)_{\ell+1}$  are active according to the current sparsification factor  $\gamma_i$ . More precisely, the above defined  $\text{CONDITION}(i, j, \gamma_i)$  is implemented as  $\text{CONDITION}(i, j, \gamma_i) = p_{ri\ell} \leq \gamma_i$  where  $\ell$  is the even index pointing to move generator  $L(T)_\ell$  having  $i$  and  $j$  as endpoints.

Depending on how the inclusion percentage values are defined we can model the classical or the vertex-wise management of the dynamic move generators for a sparsification rule  $r \in R$ . In the classical management  $\sum_{i \in V} \sum_{\ell \in L(T_r, i)} p_{ri\ell} = 1$  whereas in the vertex-wise management  $\sum_{\ell \in L(T_r, i)} p_{ri\ell} = 1$  for each  $i \in V$ .

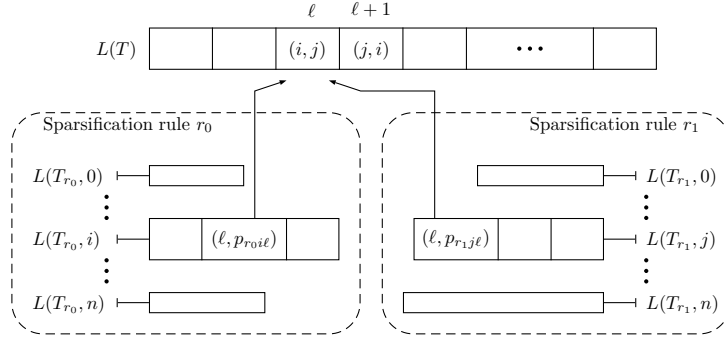

**Figure 4** Implementation of the list  $L(T)$  of move generators defined by two sparsification rules  $r_0$  and  $r_1$ . Two move generators  $(i, j)$  and  $(j, i)$  indexed  $\ell$  and  $\ell + 1$  respectively, are explicitly shown. As can be seen, those move generators are defined by both sparsification rules and the associated entry in the lists point to the same shared entry in  $L(T)$ . The inclusion percentages  $p_{r_0 i \ell}$  and  $p_{r_1 j \ell}$  might however cause those move generators to be active at different times according to the value of  $\gamma_i$  and  $\gamma_j$ .

The complete dynamic set of move generators can thus be addressed by iterating over each sparsification rule  $r \in R$ , each vertex  $i \in V$ , each list  $L(T_r, i)$ , and considering move generators  $(i, j)_\ell$  and  $(j, i)_{\ell+1}$  such that  $p_{r i \ell} \leq \gamma_i$ .

Note that by storing indices instead of move generators, different sparsification rules identifying the same subset of move generators would point to the same entry of  $L(T)$ .

In our implementation, the Sparsification Rule  $r_0$  described in Section 2.2.2 is implemented by defining  $p_{r_0 v \ell} = n/|L(T_{r_0}, v)|$ , where  $n$  is the index of move generator  $\ell$  in a list of move generators  $(i, j) \in L(T_{r_0}, i)$  sorted in increasing  $c_{ij}$  cost. The additional Sparsification Rule  $r_1$  employed in the analysis of Section 4.4 defines instead  $p_{r_1 v \ell} = n/|T_{r_1}|$ , where  $n$  is the index of move generator  $\ell$  in a list of move generators  $(i, j) \in L(T_{r_1})$  sorted in increasing  $c_{ij}$  cost.

## B.2. An Abstract SMD-based Local Search Operator

The general structure of all SMD-based local search operators we used is shown in Algorithm 1. Note that, as mentioned in Section 2.2.3, we use the terms SMD and move generator interchangeably.

First, during a *pre-processing* step, additional computation useful for the actual neighborhood exploration may be executed. As an example, TAILS and SPLIT benefit from pre-computing route cumulative loads.

A heap data structure  $\mathcal{H}$  is initialized with the currently active move generators according to the sparsification vector  $\gamma$ , and such that at least one of the endpoints belongs to the set  $\bar{V}_S$  of cached vertices for the solution  $S$  under examination. In particular, those move generators, denoted by  $T^\gamma(S)$ , can be easily retrieved by using the data structures defined in Section B.1 and, more specifically,  $T^\gamma(S) = \bigcup_{r \in R, i \in \bar{V}_S} \{(i, j)_\ell : p_{r i \ell} \leq \gamma_i, \ell \in L(T_r, i)\}$ . When dealing with local search operators defining asymmetric neighborhoods, both  $(i, j)_\ell$  and  $(j, i)_{\ell+1}$  have to be included. Given condition 1 on list  $L(T)$  defined in Section B.1, this can be done by setting  $T^\gamma(S) = T^\gamma(S) \cup \bigcup_{r \in R, i \in \bar{V}_S} \{(j, i)_{\ell+1} : p_{r i \ell} \leq \gamma_i, \ell \in L(T_r, i)\}$ .

For each move generator  $(i, j) \in T^\gamma(S)$ , the  $\delta$ -tag  $\delta(i, j)$ , identifying the effect of the application of the move induced by  $(i, j)$  on  $S$ , is computed. Every  $(i, j)$  inducing an improving move (i.e.,  $\delta(i, j) < 0$ ) is inserted into

the heap data structure  $\mathcal{H}$ . By only inserting improving move generators, the heap computational complexity is kept at its minimum.

The heap  $\mathcal{H}$  is linearly scanned until a feasible move is found. If such a move cannot be found, then  $S$  is considered to be a local optimum with respect to the local search operator under examination. Note that by heuristically restricting the initialization stage to only consider move generators involving vertices in  $\bar{V}_S$  some improvement may be overlooked, but, as shown by the experiments in Section 4.5, this does not significantly affect the final solution quality.

Once a move generator  $(i, j)$  inducing a feasible and improving change to  $S$  is found, a list  $A$  of operator-dependant affected vertices is assembled. The application of  $(i, j)$  during the execute stage will change some of the  $\delta$ -tag of move generators involving vertices in  $A$ .

The update stage recomputes the  $\delta$ -tag for active move generators  $U_{(i,j)} = \bigcup_{r \in R, i \in A} \{(v_1, v_2)_\ell : \ell \in L(T_r, i) \wedge (v_1 = i \vee v_2 = i) \wedge p_{ri\ell} \leq \gamma_i\}$ . In case of an asymmetric neighborhood, the updates are extended to  $U_{(i,j)} = U_{(i,j)} \cup \bigcup_{r \in R, i \in A} \{(v_2, v_1)_{\ell+1} : \ell \in L(T_r, i) \wedge (v_1 = i \vee v_2 = i) \wedge p_{ri\ell} \leq \gamma_i\}$ . For each move generator requiring an update  $(v_1, v_2) \in U_{(i,j)}$ , the following cases are possible:

- $(v_1, v_2)$  is removed from the heap  $\mathcal{H}$  if  $(v_1, v_2) \in \mathcal{H}$  and  $\delta(v_1, v_2) \geq 0$ ;
- $(v_1, v_2)$  is inserted into the heap  $\mathcal{H}$  if  $(v_1, v_2) \notin \mathcal{H}$  and  $\delta(v_1, v_2) < 0$ ;
- the heap property is checked and possibly restored if  $(v_1, v_2) \in \mathcal{H}$  and  $\delta(v_1, v_2) < 0$ ;
- finally,  $(v_1, v_2)$  is ignored if  $(v_1, v_2) \notin \mathcal{H}$  and  $\delta(v_1, v_2) \geq 0$ .

Since different sparsification rules may refer to the same move generators, a timestamp associated with each move generator  $(i, j)$  can be used to avoid evaluating it more than once, both in the initialization and in the update stages. Note that also when using a single sparsification rule  $r$ , a double evaluation may occur when  $i, j \in A$  and  $T_\ell = (i, j)_\ell$  is such that  $\ell \in L(T_r, i) \wedge p_{ri\ell} < \gamma_i$  and  $\ell \in L(T_r, j) \wedge p_{rj\ell} < \gamma_j$ .

---

**Algorithm 1** Abstract SMD-Based Local Search Operator

---

```

1: procedure APPLY( $S, T^\gamma$ )
2:   PREPROCESS( $S$ )
3:    $\mathcal{H} \leftarrow$  INITIALIZATION( $S, T^\gamma$ )
4:    $n \leftarrow 0$ 
5:   while  $n < \text{len}(\mathcal{H})$  do
6:      $(i, j) \leftarrow$  PEEK( $\mathcal{H}, n$ )
7:      $n \leftarrow n + 1$ 
8:     if  $\neg$ ISFEASIBLE( $S, (i, j)$ ) then continue
9:      $A \leftarrow$  AFFECTEDVERTICES( $S, (i, j)$ )
10:     $S \leftarrow$  EXECUTE( $S, (i, j)$ )
11:    UPDATE( $\mathcal{H}, T^\gamma, A$ )
12:     $n \leftarrow 0$ 
13:  end while
14: end procedure

```

---

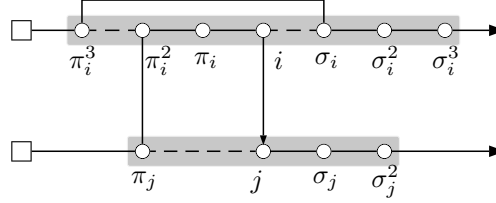

**Figure 5** A 30EX application induced by move generator  $(i, j)$  relocating path  $(\pi_i^2 - i)$  between  $\pi_j$  and  $j$ . Some SMDs involving vertices in the gray area require an update to their  $\delta$ -tag after the move execution.

B.2.0.1. *Restricted Update for Asymmetric Neighborhoods.* The  $\delta$ -tag update of move generators involving a vertex  $i \in A$  for a local search operator defining an asymmetric neighborhood may sometimes be restricted from  $\{(i, v_2), (v_1, i) : v_1, v_2 \in V\} \cap T^\gamma$  to only one between  $\{(i, v_2) : v_2 \in V\} \cap T^\gamma$  and  $\{(v_1, i) : v_1 \in V\} \cap T^\gamma$ . As an example, consider the 30EX application shown in Figure 5. The set of affected vertices is  $A = \{\pi_i^3, \pi_i^2, \pi_i, i, \sigma_i, \sigma_i^2, \sigma_i^3, \pi_j, j, \sigma_j, \sigma_j^2\}$ . However, not all move generators  $\{(i, j), (j, i) : i \in A, j \in V\} \cap T^\gamma$  have to be updated. For example, considering vertex  $\pi_i^3$ , move generators  $(\pi_i^3, j), j \in V$  require an update since the successor of  $\pi_i^3$  changes after the move execution, however, move generators  $(j, \pi_i^3), j \in V$  do not, in fact, the predecessor of  $\pi_i^3$  remains the same. For operator 30EX (and ignoring the current sparsification level), the total number of move generators requiring an update after a 30EX application can be reduced of approximately 36%.

Finally, we refer to Section B.3 of the Appendix for the operator-dependant definitions of the feasibility check, the assembly of the list  $A$  of vertices, the restricted update and the execution stage.

### B.2.1. Dynamic Vertex-wise Move Generators for SMD-based Local Search Operators.

Vertex-wise management of move generators requires a little extra care for the SMD update stage to be correctly performed. To highlight this, consider a scenario in which a vertex  $j$  is currently marked as cached at the beginning of a neighborhood exploration for a solution  $S$ ; that is,  $j \in \bar{V}_S$ . An illustrative example is shown in Figure 6. The figure represents a portion of an instance with six customers together with a number of move generators depicted as lines ending with little circles. In particular, for a move generator  $(v_1, v_2)$ , a full circle near to  $v_1$  means that the move generator is currently active in  $v_1$ , i.e.,  $p_{rv_1\ell} \leq \gamma_{v_1}$  where  $\ell$  is the index of  $(v_1, v_2)_\ell$  in  $L(T)$ , while an empty circle represents the opposite scenario, i.e.,  $p_{rv_1\ell} > \gamma_{v_1}$ . In the

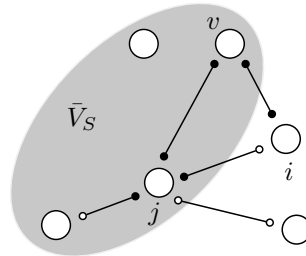

**Figure 6** A portion of an instance containing six customers (circles) and five move generators (lines). A move generator  $(v_1, v_2)_\ell$  active in  $v_1$ , i.e.,  $p_{rv_1\ell} \leq \gamma_{v_1}$ , is represented with a full circle near to  $v_1$ , whereas an empty circle denotes the opposite, i.e.,  $p_{rv_1\ell} > \gamma_{v_1}$ . As an example  $(i, j)$  is active in  $j$  but not in  $i$ . The direction of move generators is not shown because not relevant.

example,  $(i, j)$  is active in  $j$  but not in  $i$ . Finally, the grayed area identifies the set  $\bar{V}_S$  of currently cached vertices for  $S$ .

During the SMD initialization stage, move generators involving vertices in  $\bar{V}_S$  are considered to be inserted into the heap data structure  $\mathcal{H}$ . Suppose that, because inducing an improving move and currently active in  $j$ , move generator  $(i, j)$  along with other improving move generators including  $(i, v)$  are inserted into  $\mathcal{H}$ . During the SMD search stage, move generator  $(i, v)$  is found feasible before the evaluation of  $(i, j)$ . The move induced by  $(i, v)$  is then applied and a number of affected vertices  $A$  may be such that  $i \in A$  but  $j \notin A$ . Note that  $i$  shares  $(i, j)$  with  $j$  but  $(i, j)$  is not currently active in  $i$  because of the sparsification factor  $\gamma_i$ . The SMD update stage requires that, from each vertex  $v \in A$  active move generators are updated. *Should  $(i, j)$  still be updated even if not active in  $i$ ?* The answer is yes. Being  $(i, j)$  active in  $j$ , it may be, as described in this scenario, already into the heap  $\mathcal{H}$  and possibly be extracted during future search stages. In fact, being  $i$  among the affected vertices  $A$  as a result of the application of  $(i, v)$ , the  $\delta$ -tag of any move generator involving a vertex  $v \in A$  requires an update, and hence  $(i, j)$  does. On the other hand, if  $(i, j)$  were not active in both  $j$  and  $i$ , updating it after  $(i, v)$  was not required because it could have never been inserted into  $\mathcal{H}$ .

The dynamic management of vertex-wise move generators may thus require the update of move generators that are not active in one of the affected vertices but only active in the other endpoint that may not be in the list of vertices affected by the move application. A possible implementation uses two additional flags per move generator  $(i, j)$  storing whether it is active in  $i$  and/or in  $j$ . During the SMD update stage the flags are checked to identify whether an update is required.

Finally, note that this approach works correctly under the assumption that the sparsification vector  $\gamma$  is not changed during a neighborhood exploration.

### B.3. SMD Implementation Details of Local Search Operators

In the following, we provide a detailed description of the implementation for the local search operators used in FILO. In particular, we detail the operator-dependant procedures to be defined when applying a move induced by a move generator  $(i, j)$  within an SMD-based operator. To better accomplish this, we introduce few additional notation elements. In particular, we denote by  $\pi_i^\ell$  and  $\sigma_i^\ell$  the  $\ell^{th}$ - predecessor and successor of vertex  $i \in V$ , respectively, in the solution under examination. We omit the apex when  $\ell = 1$ . Moreover, we identify with  $q_i^{up}$  and  $q_i^{from}$  the cumulative load up to and from any customer  $i \in V_c$  included, i.e.,  $q_i^{up} = q_i + q_{\pi_i} + q_{\pi_i^2} + \dots + q_0$  and  $q_i^{from} = q_i + q_{\sigma_i} + q_{\sigma_i^2} + \dots + q_0$ . In the following paragraphs, a figure is shown for each local search operator highlighting the move induced by a move generator  $(i, j)$  and the set of vertices affected by its application (grayed area). Note that the move generator direction does not necessarily reflect the crossing direction in the resulting route. Finally, as defined in Section 2.2, path is used to refer to a contiguous sequence of vertices belonging to a route, and head and tail are used to denote a path belonging respectively to the initial and final part of a route.

**B.3.1. TWOPT.** Replace a path of vertices with its reverse.

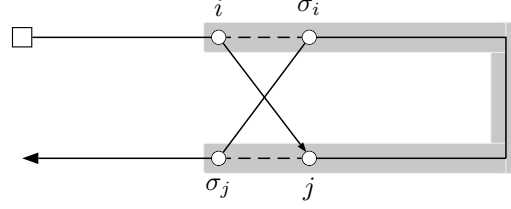

- Type: symmetric.
- Pre-processing: none.
- Cost computation:  $\delta_{ij} = -c_{i\sigma_i} + c_{ij} - c_{j\sigma_j} + c_{\sigma_i\sigma_j}$ .
- Feasibility Check:  $r_i = r_j$ .
- Update List: all vertices between  $i$  and  $\sigma_j$ , for which successors and predecessors change after the move application.
- Execution: reverse the path between  $\sigma_i$  and  $j$  included.

**B.3.2. SPLIT.** Replace the tail of route  $r_i$  with the reversed head of route  $r_j$  and replace the head of route  $r_j$  with the reversed tail of route  $r_i$ .

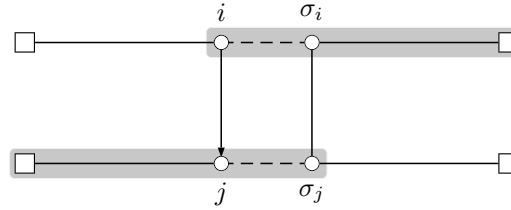

- Type: symmetric.
- Pre-processing: compute  $q_i^{up}$  and  $q_i^{from}$  for any customer  $i \in V_c$ .
- Cost Computation:  $\delta_{ij} = -c_{i\sigma_i} + c_{ij} - c_{j\sigma_j} + c_{\sigma_i\sigma_j}$ .
- Feasibility Check:  $(r_i \neq r_j) \wedge (q_i^{up} + q_j^{up} \leq Q) \wedge (q_{\sigma_j}^{from} + q_{\sigma_i}^{from} \leq Q)$ .
- Update List: all vertices from  $i$  to the depot and from the depot to  $\sigma_j$ , for which successors and predecessors change after the move application.
- Execution: replace  $(i, \sigma_i)$  and  $(j, \sigma_j)$  with  $(i, j)$  and  $(\sigma_i, \sigma_j)$  and reverse paths from depot to  $j$  and from  $\sigma_i$  to depot. Update the cumulative load  $q_v^{up}$  and  $q_v^{from}$  for customers  $v$  belonging to  $r_i$  and  $r_j$ , if not empty.

**B.3.3. TAILS.** Swap the tails of two different routes.

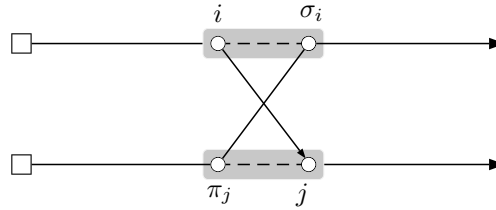

- Type: asymmetric.
- Pre-processing: compute  $q_i^{up}$  and  $q_i^{from}$  for any customer  $i \in V_c$ .
- Cost Computation:  $\delta_{ij} = -c_{i\sigma_i} + c_{ij} - c_{j\pi_j} + c_{\pi_j\sigma_i}$ .
- Feasibility Check:  $(r_i \neq r_j) \wedge (q_i^{up} + q_j^{from} \leq Q) \wedge (q_{\pi_j}^{up} + q_{\sigma_i}^{from} \leq Q)$ .
- Update List:  $i, \sigma_i, j$  and  $\pi_j$ .

The update can be restricted to move generators  $\{(i, v), (v, \sigma_i), (v, j), (\pi_j, v) : v \in V\} \cap T^\gamma$ .

- Execution: replace  $(i, \sigma_i)$  and  $(\pi_j, j)$  with  $(i, j)$  and  $(\pi_j, \sigma_i)$ . Update the cumulative load  $q_v^{up}$  and  $q_v^{from}$  for customers  $v$  belonging to  $r_i$  and  $r_j$ , if not empty.

**B.3.4. n0EX with  $n \geq 1$ .** Relocate a path of  $n$  vertices within the same or into a different route.

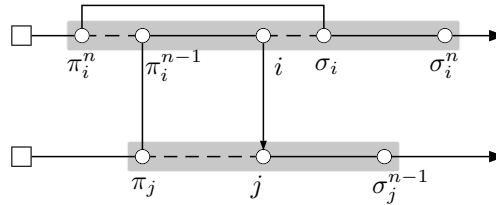

- Type: asymmetric.
- Pre-processing: none.
- Cost Computation:  $\delta_{ij} = -c_{\pi_i^n \pi_i^{n-1}} - c_{i\sigma_i} - c_{j\pi_j} + c_{\pi_i^n \sigma_i} + c_{\pi_j \pi_i^{n-1}} + c_{ij}$ .
- Feasibility Check: logical disjunction of

$$-(r_i = r_j) \wedge \bigwedge_{\ell=1}^{n-1} (j \neq \pi_i^\ell) \wedge (j \neq \sigma_i).$$

When  $r_i = r_j$  and  $\bigvee_{\ell=1}^{n-1} j = \pi_i^\ell$ , the path to relocate overlaps with the destination position.

When  $r_i = r_j$  and  $j = \sigma_i$ , the move does nothing but the  $\delta_{ij}$  computation is not correct.

$$-(r_i \neq r_j) \wedge (i \neq 0) \wedge \bigwedge_{\ell=1}^{n-1} (\pi_i^\ell \neq 0) \wedge (q_{r_j} + q_i + \sum_{\ell=1}^{n-1} q_{\pi_i^\ell} \leq Q).$$

The condition makes sure the depot is not relocated and the capacity constraint of the target route is respected.

- Update List:  $\bigcup_{\ell=1}^n \pi_i^\ell \cup i \cup \bigcup_{\ell=1}^n \sigma_i^\ell \cup \pi_j \cup j \cup \bigcup_{\ell=1}^{n-1} \sigma_j^\ell$ .
- The update can be restricted to move generators

- $\{(\pi_i^n, v), (\pi_i^{n-1}, v), (v, \pi_i^{n-1}) : v \in V\} \cap T^\gamma$ ;
- $\{(\pi_i^\ell, v) : \ell = n-2, \dots, 1 \text{ and } v \in V\} \cap T^\gamma$ ;
- $\{(i, v) : v \in V\} \cap T^\gamma$ ;
- if  $n = 1$  include  $\{(v, i) : v \in V\} \cap T^\gamma$ ;
- $\{(\sigma_i, v), (v, \sigma_i) : v \in V\} \cap T^\gamma$ ;
- $\{(\sigma_i^\ell, v) : \ell = 2, \dots, n \text{ and } v \in V\} \cap T^\gamma$ ;
- $\{(\pi_j, v) : v \in V\} \cap T^\gamma$ ;
- $\{(j, v), (v, j) : v \in V\} \cap T^\gamma$ ;
- $\{(\sigma_j^\ell, v) : \ell = 1, \dots, n-1 \text{ and } v \in V\} \cap T^\gamma$ .

- Execution: replace  $(\pi_i^n, \pi_i^{n-1}), (i, \sigma_i)$  and  $(j, \pi_j)$  with  $(\pi_i^n, \sigma_i), (\pi_i^{n-1}, \pi_j)$  and  $(i, j)$ .

**B.3.5. n0REX with  $n \geq 2$ .** Relocate a reversed path of  $n$  vertices within the same or into a different route.

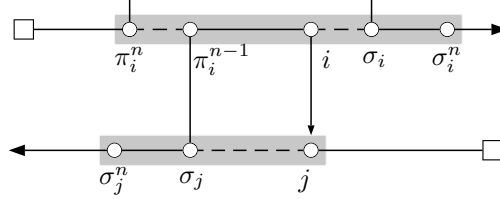

- Type: asymmetric.
- Pre-processing: none.
- Cost Computation:  $\delta_{ij} = -c_{\pi_i^n \pi_i^{n-1}} - c_{i\sigma_i} - c_{j\sigma_j} + c_{\pi_i^n \sigma_i} + c_{\sigma_j \pi_i^{n-1}} + c_{ij}$ .
- Feasibility Check: logical disjunction of

$$-(r_i = r_j) \wedge \bigwedge_{\ell=1}^n (j \neq \pi_i^\ell).$$

When  $r_i = r_j$  and  $\bigvee_{\ell=1}^{n-1} j = \pi_i^\ell$ , the path to relocate overlaps with the destination position.

When  $r_i = r_j$  and  $j = \pi_i^n$ , the move could be reduced to a TWOPT induced by move generator  $(j, i)$  but would require a special handling in this context.

$$-(r_i \neq r_j) \wedge (i \neq 0) \wedge \bigwedge_{\ell=1}^{n-1} (\pi_i^\ell \neq 0) \wedge (q_{r_j} + q_i + \sum_{\ell=1}^{n-1} q_{\pi_i^\ell} \leq Q).$$

The condition makes sure the depot is not relocated and the capacity constraint of the target route is respected.

- Update List:  $\bigcup_{\ell=1}^n \pi_i^\ell \cup i \cup \bigcup_{\ell=1}^n \sigma_i^\ell \cup j \cup \bigcup_{\ell=1}^n \sigma_j^\ell$ .

The update can be restricted to move generators

- $\{(\pi_i^\ell, v), (\pi_i^\ell, v), (i, v), (v, i) : \ell = n, \dots, 1 \text{ and } v \in V\} \cap T^\gamma$ ;
- $\{(\sigma_i^\ell, v), (\sigma_j^\ell, v) : \ell = 1, \dots, n \text{ and } v \in V\} \cap T^\gamma$ ;
- $\{(j, v), (v, j) : v \in V\} \cap T^\gamma$ .

- Execution: replace  $(\pi_i^n, \pi_i^{n-1}), (i, \sigma_i)$  and  $(j, \sigma_j)$  with  $(\pi_i^n, \sigma_i), (\pi_i^{n-1}, \sigma_j)$  and  $(i, j)$ .

**B.3.6.  $nmEX$  with  $1 \leq m \leq n$ .** Swap a path of  $n$  vertices with a path of  $m$  vertices within the same or between different routes.

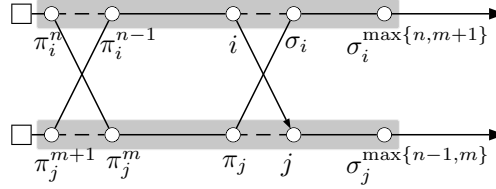

- Type: asymmetric.
- Pre-processing: none.
- Cost Computation:  $\delta_{ij} = -c_{\pi_i^n \pi_i^{n-1}} - c_{i\sigma_i} - c_{\pi_j^{m+1} \pi_j^m} - c_{j\pi_j} + c_{\pi_i^n \pi_j^m} + c_{\pi_j \sigma_i} + c_{\pi_j^{m+1} \pi_i^{n-1}} + c_{ij}$ .
- Feasibility Check: logical disjunction of

$$-(r_i = r_j) \wedge \bigwedge_{\ell=1}^{n-1} (j \neq \pi_i^\ell) \wedge \bigwedge_{\ell=1}^{m+1} (j \neq \sigma_i^\ell).$$

When  $r_i = r_j$  and  $\bigvee_{\ell=1}^m j = \sigma_i^\ell \vee \bigvee_{\ell=1}^{n-2} j = \pi_i^\ell$ , the paths overlap.

When  $r_i = r_j$  and  $j = \sigma_i^{m+1}$ , the move could be reduced to a  $m0EX$  induced by move generator  $(\sigma_i, \pi_i^{n-1})$  or to a  $n0EX$  induced by move generator  $(i, j)$  but would require a special handling in this context.

When  $r_i = r_j$  and  $j = \pi_i^{n-1}$ , vertex  $j$  is at the same time part of the path to move and destination of the movement.

$$-(r_i \neq r_j) \wedge (i \neq 0) \wedge \bigwedge_{\ell=1}^{n-1} (\pi_i^\ell \neq 0) \wedge \bigwedge_{\ell=1}^m (\pi_j^\ell \neq 0) \wedge (q_{r_j} + q_i + \sum_{\ell=1}^{n-1} q_{\pi_i^\ell} - \sum_{\ell=1}^m q_{\pi_j^\ell} \leq Q) \wedge (q_{r_i} - q_i - \sum_{\ell=1}^{n-1} q_{\pi_i^\ell} + \sum_{\ell=1}^m q_{\pi_j^\ell} \leq Q).$$

The condition makes sure the depot is not relocated and the capacity constraints are not violated.

- Update List:  $\bigcup_{\ell=1}^n \pi_i^\ell \cup i \cup \bigcup_{\ell=1}^{\max\{n,m+1\}} \sigma_i^\ell \cup \bigcup_{\ell=1}^{m+1} \pi_j^\ell \cup j \cup \bigcup_{\ell=1}^{\max\{n-1,m\}} \sigma_j^\ell$ .

The update can be restricted to move generators

- $\{(\pi_i^n, v) : v \in V\} \cap T^\gamma$ ;
- $\{(\pi_i^\ell, v) : \ell = n-1, \dots, 1 \text{ and } v \in V\} \cap T^\gamma$ ;
- $\{(v, \pi_i^\ell) : \ell = n-1, \dots, n-1-m \text{ and } v \in V\} \cap T^\gamma$ ;
- $\{(i, v) : v \in V\} \cap T^\gamma$ ;
- if  $n-m < 2$  include  $\{(v, i) : v \in V\} \cap T^\gamma$ ;
- $\{(\sigma_i, v), (v, \sigma_i) : v \in V\} \cap T^\gamma$ ;
- $\{(\sigma_i^\ell, v) : \ell = 2, \dots, n \text{ and } v \in V\} \cap T^\gamma$ ;
- $\{(v, \sigma_i^\ell) : \ell = 2, \dots, m+1 \text{ and } v \in V\} \cap T^\gamma$ ;
- $\{(\pi_j^{m+1}, v) : v \in V\} \cap T^\gamma$ ;
- $\{(\pi_j^\ell, v), (v, \pi_j^\ell) : \ell = m, \dots, 1 \text{ and } v \in V\} \cap T^\gamma$ ;
- $\{(j, v), (v, j) : v \in V\} \cap T^\gamma$ ;
- $\{(\sigma_j^\ell, v) : \ell = 1, \dots, n-1 \text{ and } v \in V\} \cap T^\gamma$ ;
- $\{(v, \sigma_j^\ell) : \ell = 1, \dots, m \text{ and } v \in V\} \cap T^\gamma$ .

- Execution: replace  $(\pi_i^n, \pi_i^{n-1})$ ,  $(i, \sigma_i)$ ,  $(\pi_j^{m+1}, \pi_j^m)$  and  $(j, \pi_j)$  with  $(\pi_i^n, \pi_j^m)$ ,  $(\pi_i^{n-1}, \pi_j^{m+1})$ ,  $(\pi_j, \sigma_i)$  and  $(i, j)$ .

**B.3.7.  $nm$ REX (and  $nm$ REX\*) with  $1 \leq m \leq n$ .** Swap a reversed path of  $n$  vertices with a path of  $m$  vertices within the same or between different routes ( $nm$ REX). If  $m \geq 2$ , we consider an additional variant that also reverses the path of  $m$  vertices ( $nm$ REX\*).

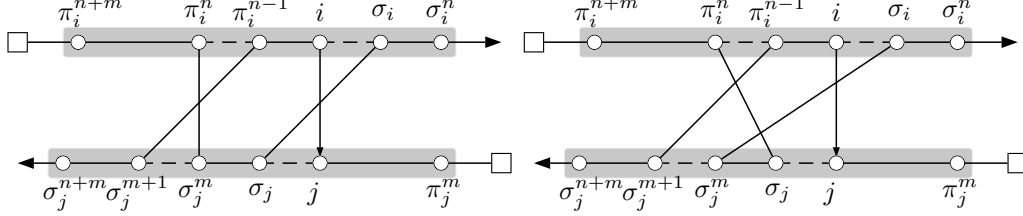

- Type: asymmetric.

- Pre-processing: none.

- Cost Computation:

$$-nmREX^*: \delta_{ij} = -c_{\pi_i^n \pi_i^{n-1}} - c_{i\sigma_i} - c_{j\sigma_j} - c_{\sigma_j^m \sigma_j^{m+1}} + c_{\pi_i^n \sigma_j^m} + c_{\pi_i^{n-1} \sigma_j^{m+1}} + c_{\sigma_j \sigma_i} + c_{ij}.$$

$$-nmREX: \delta_{ij} = -c_{\pi_i^n \pi_i^{n-1}} - c_{i\sigma_i} - c_{j\sigma_j} - c_{\sigma_j^m \sigma_j^{m+1}} + c_{\pi_i^n \sigma_j} + c_{\pi_i^{n-1} \sigma_j^{m+1}} + c_{\sigma_j^m \sigma_i} + c_{ij}.$$

- Feasibility Check: logical disjunction of

$$-(r_i = r_j) \wedge \bigwedge_{\ell=1}^{n+m} (j \neq \pi_i^\ell).$$

When  $r_i = r_j$  and  $\bigvee_{\ell=1}^{n+m-1} j = \sigma_i^\ell$ , the paths overlap.

When  $r_i = r_j$  and  $j = \sigma_i^{m+n}$

\*  $nm$ REX\*: the move could be reduced to a TWOPT induced by move generator  $(j, i)$ ;

\*  $nm$ REX: the move could be reduced to a  $n$ OREX induced by move generator  $(i, j)$ ;

but, in both cases, this would require a special handling.

$$-(r_i \neq r_j) \wedge (i \neq 0) \wedge \bigwedge_{\ell=1}^{n-1} (\pi_i^\ell \neq 0) \wedge \bigwedge_{\ell=1}^m (\sigma_j^\ell \neq 0) \wedge (q_{r_j} + q_i + \sum_{\ell=1}^{n-1} q_{\pi_i^\ell} - \sum_{\ell=1}^m q_{\sigma_j^\ell} \leq Q) \wedge (q_{r_i} - q_i - \sum_{\ell=1}^{n-1} q_{\pi_i^\ell} + \sum_{\ell=1}^m q_{\sigma_j^\ell} \leq Q).$$

The condition makes sure the depot is not relocated and the capacity constraints are not violated.

- Update List:  $\bigcup_{\ell=1}^{n+m} \pi_i^\ell \cup i \cup \bigcup_{\ell=1}^m \sigma_i^\ell \cup \bigcup_{\ell=1}^m \pi_j^\ell \cup j \cup \bigcup_{\ell=1}^{n+m} \sigma_j^\ell$ .

The update can be restricted to move generators

$$-\{(v, \pi_i^\ell) : \ell = n+m, \dots, n+1 \text{ and } v \in V\} \cap T^\gamma;$$

$$-\{(\pi_i^\ell, v), (v, \pi_i^\ell) : \ell = n, \dots, 1 \text{ and } v \in V\} \cap T^\gamma;$$

$$-\{(i, v), (v, i) : v \in V\} \cap T^\gamma;$$

$$-\{(\sigma_i^\ell, v) : \ell = 1, \dots, n \text{ and } v \in V\} \cap T^\gamma;$$

$$-\{(\sigma_j^\ell, v) : \ell = n+m, \dots, m+1 \text{ and } v \in V\} \cap T^\gamma;$$

$$-\{(\sigma_j^\ell, v), (v, \sigma_j^\ell) : \ell = m, \dots, 1 \text{ and } v \in V\} \cap T^\gamma;$$

$$-\{(j, v), (v, j) : v \in V\} \cap T^\gamma;$$

$$-\{(v, \pi_j^\ell) : \ell = 1, \dots, m \text{ and } v \in V\} \cap T^\gamma.$$

- Execution:

—  $nm$ REX\*: Replace  $(\pi_i^n, \pi_i^{n-1}), (i, \sigma_i), (j, \sigma_j)$  and  $(\sigma_j^m, \sigma_j^{m+1})$  with  $(\pi_i^n, \sigma_j^m), (\pi_i^{n-1}, \sigma_j^{m+1}), (\sigma_j, \sigma_i)$  and  $(i, j)$ . Reverse the paths between  $\pi_i^{n-1}$  and  $i$  and the path between  $\sigma_j$  and  $\sigma_j^m$ .

—*nmREX*: Replace  $(\pi_i^n, \pi_i^{n-1}), (i, \sigma_i), (j, \sigma_j)$  and  $(\sigma_j^m, \sigma_j^{m+1})$  with  $(\pi_i^n, \sigma_j), (\pi_i^{n-1}, \sigma_j^{m+1}), (\sigma_j^m, \sigma_i)$  and  $(i, j)$ . Reverse the path between  $\pi^n - 1$  and  $i$ .

**B.3.8. EJCH.** Perform a sequence of 10EX applications.

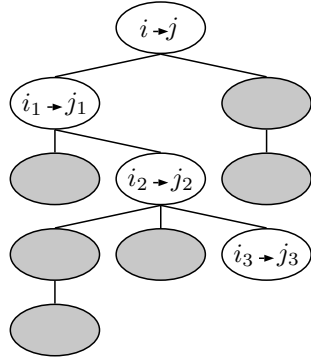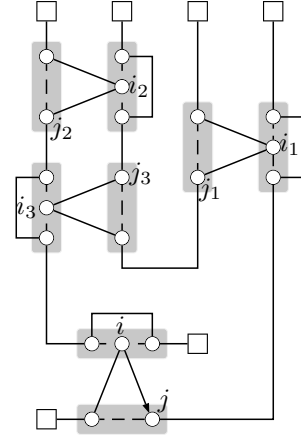

- Type: asymmetric.
- Pre-processing: none.
- Cost Computation: same as for 10EX operator.
- Feasibility Check: a tree of nodes associated with 10EX moves is generated by using  $(i, j)$  as tree root. A path from the tree root  $(i, j)$  to any other node in the tree is a sequence of 10EX moves. Every sequence  $s$  stores a number of state variables defining the effect of its application on the current solution. The goal of the feasibility check is to find a sequence whose application generates a feasible and improving solution. In particular, each sequence  $s$  contains
  - the modified loads  $q_r^s$  for each route  $r$  affected by 10EX moves of  $s$ ;
  - the change in the objective function  $\delta_s$  due to the application of 10EX moves of  $s$ ;
  - a set  $\mathcal{F}_i^s$  storing customers that cannot be relocated because already involved in previous relocate moves within  $s$ . More precisely, the successors or predecessors of customers in  $\mathcal{F}_i^s$  have changed in previous 10EX moves of  $s$  but the current structure of the solution does not reflect these changes. Note, in fact, that during the feasibility check we are only simulating the 10EX effects to find a feasible and improving sequence without really changing the solution;
  - finally, a set  $\mathcal{F}_j^s$  storing customers that cannot be the target of a relocate move because already involved in previous relocate moves within  $s$ . More precisely, the predecessors of customers in  $\mathcal{F}_j^s$  have changed in previous 10EX moves of  $s$  but, as described above, the current structure of the solution does not reflect these changes.

Note that a different handling without  $\mathcal{F}_i^s$  and  $\mathcal{F}_j^s$  would require, for each tree node associated with a sequence  $s$ , to keep a copy of the solution.

A sequence  $s$  of 10EX moves generating a cost change  $\delta_s$  in the objective function, ending with a move  $(i_n, j_n)$  that relocates customer  $i_n \in V_c$  from route  $r_{i_n}$  to route  $r_{j_n}$  before vertex  $j_n \in V$ , is extended by scanning all customers  $i_{n+1}$  belonging to  $r_{j_n} = r_{i_{n+1}}$  that satisfy the following joint conditions:

$$- q_{r_{i_{n+1}}}^s - q_{i_{n+1}} \leq Q.$$

The removal of  $i_{n+1}$  restores the feasibility of route  $r_{i_{n+1}}$  that was violated by the previous insertion of  $j_n$ .

$$- i_{n+1} \notin \mathcal{F}_i^s.$$

Customer  $i_{n+1}$  can be relocated.

Every customer  $i_{n+1}$  satisfying the previous conditions is considered as the new starting point for a 10EX for which a potential endpoint is generated by scanning the currently active move generators  $T^\gamma$  that have  $i_{n+1}$  as the object of the relocation, i.e.,  $\{(i_{n+1}, j_{n+1}), j_{n+1} \in V_c\} \cap T^\gamma$ . A customer  $j_{n+1} \in V_c$  belonging to route  $r_{j_{n+1}}$  is selected to be the target of the relocation if it satisfies the following joint conditions:

$$- j_{n+1} \neq 0.$$

The depot alone does not allow to identify a specific route.

$$- r_{i_{n+1}} \neq r_{j_{n+1}}.$$

Customer  $i_{n+1}$  is relocated into a route different from the origin one.

$$- \delta_s + \delta_{i_{n+1}j_{n+1}} < 0.$$

Sequence  $s$  still provides an improvement to the objective function.

$$- j_{n+1} \notin \mathcal{F}_j^s.$$

Customer  $j_{n+1}$  can be the target of a relocation.

Every customer  $j_{n+1}$  satisfying the previous conditions is considered as an endpoint for the  $(i_{n+1}, j_{n+1})$  10EX move and a new tree node  $s'$ , son of the current one  $s$ , is created. State variables of  $s'$  are defined as follows:

$$- q_{r_{i_{n+1}}}^{s'} = q_{r_{i_{n+1}}}^s - q_{i_{n+1}};$$

$$- q_{r_{j_{n+1}}}^{s'} = q_{r_{j_{n+1}}}^s + q_{j_{n+1}};$$

$$- \delta_{s'} = \delta_s + \delta_{i_{n+1}j_{n+1}};$$

$$- \mathcal{F}_i^{s'} = \mathcal{F}_i^s \cup \{\pi_{i_{n+1}}, i_{n+1}, \sigma_{i_{n+1}}, \pi_{j_{n+1}}, j_{n+1}\};$$

$$- \mathcal{F}_j^{s'} = \mathcal{F}_j^s \cup \{i_{n+1}, \sigma_{i_{n+1}}, j_{n+1}\}.$$

The tree frontier is explored by following a best- $\delta$ -first strategy, that is, the sequence providing the greatest improvement is always extended first. This is obtained by using an additional heap data structure managing the tree nodes. As can be inferred by the above description, sequences are not limited in depth and the same route can be accessed by a 10EX move more than once. A limit is, however, imposed on the total maximum number of explored tree nodes which in the proposed implementation is  $n_{EC} = 25$ . Finally, the feasibility check step ends as soon as a feasible sequence is found, i.e., the last 10EX move does not violate the capacity of the target route, or the maximum number of tree nodes is explored.

- Update List:  $\mathcal{F}_i^{s^*}$  with  $s^*$  a feasible improving sequence.

For each 10EX  $(i, j)$  move generator composing the sequence  $s^*$ , the update can be restricted to move generators  $\{(\pi_i, v), (i, v), (v, i), (\sigma_i, v), (v, \sigma_i), (j, v), (v, j), (\pi_j, v) : v \in V\} \cap T^\gamma$

- Execution: execute the 10EX moves of a feasible sequence. Note that, due to the restrictions imposed during the sequence space exploration, the order in which moves are executed does not affect the final result.

## Appendix C: Computational details for $\mathbb{X}$ instances

Detailed results about computations on the  $\mathbb{X}$  dataset can be found in Tables 3 – 5 and Figure 7. Moreover, to better assess whether the results obtained by FILO are statistically different with respect to competing algorithms, we followed the procedure used in Christiaens and Vanden Berghe (2020). In particular, we conducted a one-tailed Wilcoxon signed-rand test (Wilcoxon (1945)) in which we consider a null hypothesis  $H_0$

$$H_0 : \text{AVERAGECOST}(\text{FILO}) = \text{AVERAGECOST}(X)$$

and an alternative hypothesis  $H_1$

$$H_1 : \text{AVERAGECOST}(\text{FILO}) > \text{AVERAGECOST}(X)$$

where  $X$  can be ILS-SP, HGSADC, KGLS, and SISR. We tested the above hypotheses on small, medium, large and over all the instances. The  $p$ -values associated with the tested hypothesis are shown in Table 2 (left). The  $p$ -values for a similar analysis in which we compared FILO (long) with competing methods are shown in Table 2 (right).

A hypothesis is rejected when its associated  $p$ -value is greater than a significance level  $\alpha$ . Failing to reject  $H_0$  means that the average results of the two compared methods are not statistically different. On the other hand, when  $H_0$  is rejected, the average results obtained by the methods are statistically different and the alternative hypothesis  $H_1$  can be tested to find whether the average results obtained by FILO are statistically greater than those of the competing method. Rejecting  $H_1$  implies that FILO performs better than the competing method.

When performing multiple comparisons involving the same data, the probability of erroneously rejecting a null hypothesis increases. To control these errors, the significance level  $\alpha$  is typically adjusted to lower values. Bonferroni correction (Dunn (1961)) is a simple method used to adjust  $\alpha$  when performing multiple

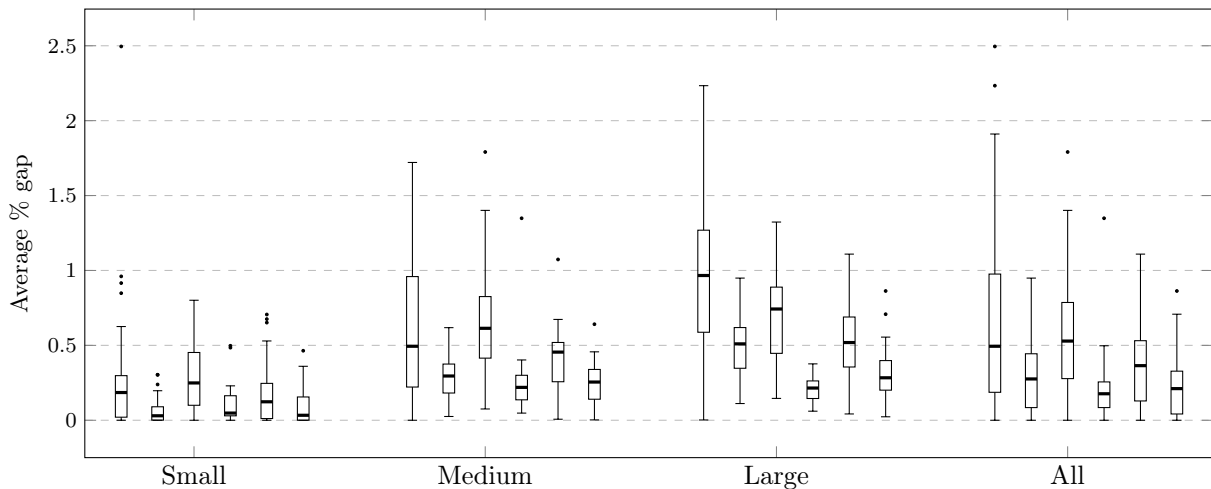

**Figure 7** Comparison of average gaps obtained by algorithms on the  $\mathbb{X}$  dataset. For each group, boxplots, from left to right, are associated with: ILS-SP, HGSADC, KGLS, SISR, FILO, and FILO (long).

**Table 2 Computations on the  $\mathbb{X}$  dataset:  $p$ -values for FILO on the left and FILO (long) on the right.**

| Small  |                 |                 |                 |                 | Small  |                 |                 |                 |                 |
|--------|-----------------|-----------------|-----------------|-----------------|--------|-----------------|-----------------|-----------------|-----------------|
|        | ILS-SP          | HGSADC          | KGLS            | SISR            |        | ILS-SP          | HGSADC          | KGLS            | SISR            |
| $H_0$  | 0.309491        | <b>0.000273</b> | 0.020427        | 0.064141        | $H_0$  | <b>0.000273</b> | 0.808654        | <b>0.000140</b> | 0.130121        |
| $H_1$  | 0.154746        | 0.999876        | 0.010214        | 0.969381        | $H_1$  | <b>0.000136</b> | 0.404327        | <b>0.000070</b> | 0.065061        |
|        | Similar         | Worse           | Similar         | Similar         |        | Better          | Similar         | Better          | Similar         |
| Medium |                 |                 |                 |                 | Medium |                 |                 |                 |                 |
|        | ILS-SP          | HGSADC          | KGLS            | SISR            |        | ILS-SP          | HGSADC          | KGLS            | SISR            |
| $H_0$  | 0.071754        | <b>0.001737</b> | <b>0.000000</b> | <b>0.000066</b> | $H_0$  | <b>0.001057</b> | 0.046584        | <b>0.000000</b> | 0.346122        |
| $H_1$  | 0.035877        | 0.999183        | <b>0.000000</b> | 0.999970        | $H_1$  | <b>0.000528</b> | 0.023292        | <b>0.000000</b> | 0.830925        |
|        | Similar         | Worse           | Better          | Worse           |        | Better          | Similar         | Better          | Similar         |
| Large  |                 |                 |                 |                 | Large  |                 |                 |                 |                 |
|        | ILS-SP          | HGSADC          | KGLS            | SISR            |        | ILS-SP          | HGSADC          | KGLS            | SISR            |
| $H_0$  | <b>0.000335</b> | 1.000000        | <b>0.000234</b> | <b>0.000000</b> | $H_0$  | <b>0.000000</b> | <b>0.000837</b> | <b>0.000000</b> | <b>0.002227</b> |
| $H_1$  | <b>0.000167</b> | 0.503678        | <b>0.000117</b> | 1.000000        | $H_1$  | <b>0.000000</b> | <b>0.000419</b> | <b>0.000000</b> | 0.998963        |
|        | Better          | Similar         | Better          | Worse           |        | Better          | Better          | Better          | Worse           |
| All    |                 |                 |                 |                 | All    |                 |                 |                 |                 |
|        | ILS-SP          | HGSADC          | KGLS            | SISR            |        | ILS-SP          | HGSADC          | KGLS            | SISR            |
| $H_0$  | <b>0.000036</b> | 0.007739        | <b>0.000000</b> | <b>0.000000</b> | $H_0$  | <b>0.000000</b> | <b>0.000111</b> | <b>0.000000</b> | 0.065432        |
| $H_1$  | <b>0.000018</b> | 0.996173        | <b>0.000000</b> | 1.000000        | $H_1$  | <b>0.000000</b> | <b>0.000056</b> | <b>0.000000</b> | 0.967546        |
|        | Better          | Similar         | Better          | Worse           |        | Better          | Better          | Better          | Similar         |

$p$ -values in bold are associated with rejected hypothesis when  $\alpha = 0.003125$ .

The last row of each group contains a  $p$ -value interpretation when  $\alpha = 0.003125$ . In particular, FILO is not statistically different from the competing method when  $H_0$  cannot be rejected (Similar), FILO is statistically better when both  $H_0$  and  $H_1$  are rejected (Better), and, finally, FILO is statistically worse when  $H_0$  is rejected and  $H_1$  is not rejected (Worse).

comparisons. In particular, given  $n$  comparisons, the significance level is set to  $\alpha/n$ . In our case, for each FILO configuration, we tested a total number of  $n = 8$  hypotheses corresponding to the partitioning of instances (Small, Medium, Large, and All) and to the two hypotheses ( $H_0$  and  $H_1$ ). Thus, by assuming an initial significance level  $\alpha_0 = 0.025$ , the adjusted value becomes  $\alpha = \alpha_0/8 = 0.003125$ .

As can be seen from Table 2 (left)

- FILO performs better than ILS-SP on large instances and on all the  $\mathbb{X}$  dataset, and it has a similar performance on small and medium instances;
- FILO has a similar performance compared to HGSADC on large instances and on the whole  $\mathbb{X}$  dataset, however, HGSADC performs better on small and medium instances;
- FILO performs better than KGLS on medium and large instances, as well as on all the  $\mathbb{X}$  dataset, and it has a similar performance on small instances;
- finally, FILO has a similar performance compared to SISR on small instances, however, SISR performs better on medium, large and on all the  $\mathbb{X}$  dataset.

Table 2 (right) shows a similar analysis comparing FILO (long) with the other methods. In particular,

- FILO (long) performs better than ILS-SP on all partitions of instances;

- FILO (long) performs better than HGSADC on large and on all the  $\mathbb{X}$  dataset, and it has a similar performance on small and medium instances;
- FILO (long) performs better than KGLS on all partitions of instances;
- finally, FILO has a similar performance compared to SISR on small, medium and on the whole  $\mathbb{X}$  dataset, however, SISR performs better on large instances.

**Table 3 Computations on small-sized  $\times$  instances.**

| ID         | BKS    | ILS-SP |             | HGSADC |             | KGLS |           | SISR |           | FILO |      |       | FILO (long) |      |      |       |       |
|------------|--------|--------|-------------|--------|-------------|------|-----------|------|-----------|------|------|-------|-------------|------|------|-------|-------|
|            |        | Avg    | $\hat{t}$   | Avg    | $\hat{t}$   | Avg  | $\hat{t}$ | Avg  | $\hat{t}$ | Best | Avg  | Worst | $t$         | Best | Avg  | Worst | $t$   |
| X-n101-k25 | 27591  | 0.00   | 0.06-0.07   | 0.00   | 0.85-0.91   | 0.21 | 2.69      | 0.00 | 0.58      | 0.00 | 0.00 | 0.22  | 1.10        | 0.00 | 0.00 | 0.00  | 11.89 |
| X-n106-k14 | 26362  | 0.05   | 1.22-1.31   | 0.08   | 2.43-2.61   | 0.19 | 2.83      | 0.07 | 0.95      | 0.00 | 0.06 | 0.11  | 1.82        | 0.00 | 0.02 | 0.08  | 19.64 |
| X-n110-k13 | 14971  | 0.00   | 0.12-0.13   | 0.00   | 0.97-1.04   | 0.00 | 2.94      | 0.00 | 0.73      | 0.00 | 0.00 | 0.00  | 1.63        | 0.00 | 0.00 | 0.00  | 16.43 |
| X-n115-k10 | 12747  | 0.00   | 0.12-0.13   | 0.00   | 1.09-1.17   | 0.00 | 3.07      | 0.00 | 0.15      | 0.00 | 0.00 | 0.00  | 1.65        | 0.00 | 0.00 | 0.00  | 16.94 |
| X-n120-k6  | 13332  | 0.04   | 1.03-1.11   | 0.00   | 1.40-1.50   | 0.00 | 3.21      | 0.00 | 1.16      | 0.00 | 0.00 | 0.00  | 1.74        | 0.00 | 0.00 | 0.00  | 18.36 |
| X-n125-k30 | 55539  | 0.24   | 0.85-0.91   | 0.01   | 1.64-1.76   | 0.47 | 3.34      | 0.03 | 2.25      | 0.00 | 0.53 | 1.37  | 1.24        | 0.00 | 0.16 | 0.61  | 11.75 |
| X-n129-k18 | 28940  | 0.20   | 1.15-1.24   | 0.03   | 1.64-1.76   | 0.11 | 3.45      | 0.03 | 1.09      | 0.00 | 0.06 | 0.19  | 1.58        | 0.00 | 0.03 | 0.05  | 17.72 |
| X-n134-k13 | 10916  | 0.29   | 1.28-1.37   | 0.17   | 2.01-2.15   | 0.00 | 3.58      | 0.22 | 2.04      | 0.00 | 0.15 | 0.30  | 1.58        | 0.00 | 0.06 | 0.16  | 16.81 |
| X-n139-k10 | 13590  | 0.10   | 0.97-1.04   | 0.00   | 1.40-1.50   | 0.00 | 3.72      | 0.04 | 1.45      | 0.00 | 0.00 | 0.00  | 1.98        | 0.00 | 0.00 | 0.00  | 21.84 |
| X-n143-k7  | 15700  | 0.29   | 0.97-1.04   | 0.00   | 1.88-2.02   | 0.18 | 3.83      | 0.04 | 1.53      | 0.00 | 0.17 | 0.43  | 1.55        | 0.00 | 0.14 | 0.17  | 17.78 |
| X-n148-k46 | 43448  | 0.01   | 0.49-0.52   | 0.00   | 1.95-2.09   | 0.35 | 3.96      | 0.05 | 2.04      | 0.00 | 0.12 | 0.35  | 1.36        | 0.00 | 0.01 | 0.33  | 15.10 |
| X-n153-k22 | 21220  | 0.85   | 0.30-0.33   | 0.03   | 3.34-3.59   | 0.80 | 4.10      | 0.04 | 4.07      | 0.02 | 0.22 | 0.69  | 1.66        | 0.02 | 0.05 | 0.34  | 15.30 |
| X-n157-k13 | 16876  | 0.00   | 0.49-0.52   | 0.00   | 1.95-2.09   | 0.00 | 4.20      | 0.02 | 2.69      | 0.00 | 0.00 | 0.00  | 2.57        | 0.00 | 0.00 | 0.00  | 28.74 |
| X-n162-k11 | 14138  | 0.16   | 0.30-0.33   | 0.02   | 2.01-2.15   | 0.06 | 4.34      | 0.14 | 2.47      | 0.02 | 0.18 | 0.23  | 1.82        | 0.00 | 0.09 | 0.18  | 18.95 |
| X-n167-k10 | 20557  | 0.25   | 0.55-0.59   | 0.03   | 2.25-2.41   | 0.16 | 4.47      | 0.02 | 2.33      | 0.00 | 0.05 | 0.17  | 1.91        | 0.00 | 0.00 | 0.02  | 20.19 |
| X-n172-k51 | 45607  | 0.02   | 0.36-0.39   | 0.00   | 2.31-2.48   | 0.44 | 4.61      | 0.03 | 3.85      | 0.00 | 0.01 | 0.14  | 1.15        | 0.00 | 0.00 | 0.00  | 12.65 |
| X-n176-k26 | 47812  | 0.92   | 0.67-0.72   | 0.30   | 4.62-4.96   | 0.39 | 4.71      | 0.08 | 3.78      | 0.00 | 0.65 | 1.25  | 1.35        | 0.00 | 0.19 | 1.13  | 14.28 |
| X-n181-k23 | 25569  | 0.01   | 0.97-1.04   | 0.09   | 3.83-4.11   | 0.23 | 4.85      | 0.04 | 4.00      | 0.00 | 0.02 | 0.10  | 2.22        | 0.00 | 0.00 | 0.01  | 23.70 |
| X-n186-k15 | 24145  | 0.17   | 1.03-1.11   | 0.01   | 3.59-3.85   | 0.20 | 4.98      | 0.14 | 2.91      | 0.01 | 0.10 | 0.30  | 1.55        | 0.00 | 0.04 | 0.21  | 15.94 |
| X-n190-k8  | 16980  | 0.96   | 1.28-1.37   | 0.05   | 7.36-7.90   | 0.33 | 5.09      | 0.03 | 6.62      | 0.00 | 0.09 | 0.44  | 1.80        | 0.00 | 0.02 | 0.05  | 18.47 |
| X-n195-k51 | 44225  | 0.02   | 0.55-0.59   | 0.04   | 3.71-3.98   | 0.49 | 5.23      | 0.17 | 4.44      | 0.00 | 0.18 | 0.53  | 1.25        | 0.00 | 0.06 | 0.26  | 12.03 |
| X-n200-k36 | 58578  | 0.20   | 4.56-4.89   | 0.08   | 4.86-5.22   | 0.29 | 5.36      | 0.10 | 4.87      | 0.18 | 0.68 | 1.91  | 1.32        | 0.08 | 0.36 | 0.51  | 16.17 |
| X-n204-k19 | 19565  | 0.31   | 0.67-0.72   | 0.03   | 3.22-3.46   | 0.52 | 5.47      | 0.50 | 3.56      | 0.00 | 0.13 | 0.70  | 1.41        | 0.00 | 0.01 | 0.12  | 14.90 |
| X-n209-k16 | 30656  | 0.36   | 2.31-2.48   | 0.08   | 5.23-5.61   | 0.27 | 5.60      | 0.04 | 4.36      | 0.00 | 0.12 | 0.27  | 1.31        | 0.00 | 0.05 | 0.12  | 13.70 |
| X-n214-k11 | 10856  | 2.50   | 1.40-1.50   | 0.20   | 6.20-6.66   | 0.67 | 5.74      | 0.48 | 6.33      | 0.13 | 0.43 | 1.11  | 1.37        | 0.04 | 0.23 | 0.93  | 14.22 |
| X-n219-k73 | 117595 | 0.00   | 0.49-0.52   | 0.01   | 4.68-5.02   | 0.09 | 5.87      | 0.05 | 5.82      | 0.00 | 0.00 | 0.01  | 4.94        | 0.00 | 0.00 | 0.00  | 54.01 |
| X-n223-k34 | 40437  | 0.24   | 5.17-5.55   | 0.15   | 5.05-5.42   | 0.63 | 5.98      | 0.23 | 5.53      | 0.08 | 0.28 | 0.66  | 1.22        | 0.00 | 0.16 | 0.27  | 12.84 |
| X-n228-k23 | 25742  | 0.21   | 1.46-1.57   | 0.14   | 5.96-6.39   | 0.34 | 6.12      | 0.19 | 7.64      | 0.03 | 0.21 | 0.45  | 1.33        | 0.00 | 0.16 | 0.25  | 13.84 |
| X-n233-k16 | 19230  | 0.55   | 1.82-1.96   | 0.30   | 4.13-4.44   | 0.58 | 6.25      | 0.21 | 5.89      | 0.16 | 0.42 | 0.71  | 1.56        | 0.00 | 0.30 | 0.54  | 17.24 |
| X-n237-k14 | 27042  | 0.14   | 2.13-2.28   | 0.09   | 5.41-5.81   | 0.38 | 6.36      | 0.18 | 5.24      | 0.00 | 0.03 | 0.50  | 2.13        | 0.00 | 0.01 | 0.16  | 23.67 |
| X-n242-k48 | 82751  | 0.15   | 10.82-11.61 | 0.24   | 7.54-8.09   | 0.47 | 6.49      | 0.16 | 7.20      | 0.09 | 0.31 | 0.58  | 1.51        | 0.00 | 0.16 | 0.39  | 16.81 |
| X-n247-k50 | 37274  | 0.63   | 1.28-1.37   | 0.03   | 12.40-13.31 | 0.17 | 6.63      | 0.13 | 13.38     | 0.06 | 0.71 | 1.30  | 1.56        | 0.00 | 0.46 | 1.05  | 16.08 |
| Mean       |        | 0.31   | 1.46 - 1.57 | 0.07   | 3.65 - 3.92 | 0.28 | 4.66      | 0.11 | 3.78      | 0.03 | 0.18 | 0.47  | 1.69        | 0.00 | 0.09 | 0.25  | 18.06 |

<sup>1</sup> computed by considering the range of single-thread rating of compatible CPUs.

Table 4 Computations on medium-sized  $\times$  instances.

| ID          | BKS    | ILS-SP |               | HGSADC |               | KGLS |             | SISR |             | FILO |      | FILO (long) |      |      |      |       |       |
|-------------|--------|--------|---------------|--------|---------------|------|-------------|------|-------------|------|------|-------------|------|------|------|-------|-------|
|             |        | Avg    | $\hat{t}^1$   | Avg    | $\hat{t}^1$   | Avg  | $\hat{t}^1$ | Avg  | $\hat{t}^1$ | Best | Avg  | Worst       | $t$  | Best | Avg  | Worst | $t$   |
| X-n251-k28  | 38684  | 0.40   | 6.57-7.05     | 0.29   | 7.11-7.63     | 0.60 | 6.74        | 0.28 | 7.13        | 0.17 | 0.36 | 0.66        | 1.57 | 0.00 | 0.25 | 0.38  | 17.38 |
| X-n256-k16  | 18839  | 0.24   | 1.22-1.31     | 0.22   | 3.95-4.24     | 0.32 | 6.87        | 0.26 | 8.36        | 0.22 | 0.22 | 0.23        | 2.13 | 0.22 | 0.22 | 0.22  | 23.80 |
| X-n261-k13  | 26558  | 1.17   | 4.07-4.37     | 0.27   | 7.72-8.29     | 0.55 | 7.00        | 0.32 | 8.58        | 0.17 | 0.48 | 1.27        | 1.56 | 0.01 | 0.31 | 0.50  | 16.98 |
| X-n266-k58  | 75478  | 0.11   | 6.08-6.53     | 0.37   | 13.01-13.96   | 0.65 | 7.14        | 0.19 | 7.86        | 0.18 | 0.51 | 0.87        | 1.80 | 0.07 | 0.38 | 0.57  | 20.67 |
| X-n270-k35  | 35291  | 0.21   | 5.53-5.94     | 0.22   | 6.81-7.31     | 0.46 | 7.25        | 0.20 | 8.29        | 0.05 | 0.26 | 0.44        | 1.40 | 0.05 | 0.15 | 0.27  | 14.17 |
| X-n275-k28  | 21245  | 0.05   | 2.19-2.35     | 0.17   | 7.29-7.83     | 0.26 | 7.38        | 0.11 | 9.67        | 0.00 | 0.08 | 0.37        | 1.87 | 0.00 | 0.02 | 0.39  | 20.23 |
| X-n280-k17  | 33503  | 0.80   | 5.84-6.26     | 0.31   | 11.61-12.46   | 0.61 | 7.52        | 0.37 | 12.87       | 0.05 | 0.46 | 0.76        | 1.47 | 0.04 | 0.36 | 0.52  | 15.52 |
| X-n284-k15  | 20215  | 1.16   | 5.23-5.61     | 0.35   | 12.10-12.99   | 0.86 | 7.62        | 0.35 | 11.13       | 0.15 | 0.53 | 1.03        | 1.58 | 0.06 | 0.26 | 0.53  | 15.51 |
| X-n289-k60  | 95151  | 0.31   | 9.79-10.51    | 0.33   | 12.95-13.90   | 0.77 | 7.76        | 0.21 | 10.40       | 0.31 | 0.60 | 0.86        | 1.77 | 0.24 | 0.40 | 0.61  | 20.07 |
| X-n294-k50  | 47161  | 0.20   | 7.54-8.09     | 0.21   | 8.94-9.59     | 0.61 | 7.89        | 0.24 | 10.69       | 0.14 | 0.32 | 0.59        | 1.12 | 0.12 | 0.23 | 0.35  | 11.80 |
| X-n298-k31  | 34231  | 0.37   | 4.19-4.50     | 0.18   | 6.63-7.11     | 0.30 | 8.00        | 0.13 | 10.55       | 0.00 | 0.27 | 0.46        | 1.18 | 0.01 | 0.19 | 0.31  | 12.36 |
| X-n303-k21  | 21738  | 0.73   | 8.63-9.27     | 0.52   | 10.52-11.29   | 0.64 | 8.14        | 0.18 | 12.58       | 0.21 | 0.45 | 0.89        | 1.23 | 0.09 | 0.33 | 0.66  | 11.91 |
| X-n308-k13  | 25859  | 0.94   | 5.77-6.20     | 0.14   | 9.30-9.98     | 0.82 | 8.27        | 1.35 | 18.69       | 0.01 | 0.51 | 1.83        | 1.62 | 0.02 | 0.46 | 1.42  | 18.27 |
| X-n313-k71  | 94044  | 0.27   | 10.64-11.42   | 0.24   | 13.62-14.62   | 0.85 | 8.41        | 0.15 | 13.75       | 0.29 | 0.52 | 0.81        | 1.39 | 0.15 | 0.32 | 0.57  | 15.23 |
| X-n317-k53  | 78355  | 0.00   | 5.23-5.61     | 0.04   | 13.62-14.62   | 0.08 | 8.51        | 0.05 | 16.00       | 0.00 | 0.01 | 0.04        | 3.02 | 0.00 | 0.00 | 0.01  | 31.68 |
| X-n322-k28  | 29834  | 0.53   | 8.94-9.59     | 0.41   | 9.24-9.92     | 0.68 | 8.65        | 0.31 | 12.29       | 0.25 | 0.48 | 0.88        | 1.25 | 0.05 | 0.34 | 0.54  | 13.19 |
| X-n327-k20  | 27532  | 1.02   | 11.61-12.46   | 0.35   | 11.06-11.88   | 0.44 | 8.78        | 0.36 | 15.71       | 0.17 | 0.47 | 0.81        | 1.71 | 0.09 | 0.29 | 0.55  | 19.83 |
| X-n331-k15  | 31102  | 0.43   | 9.54-10.24    | 0.19   | 14.83-15.92   | 0.13 | 8.89        | 0.08 | 14.84       | 0.00 | 0.02 | 0.30        | 2.00 | 0.00 | 0.00 | 0.01  | 21.59 |
| X-n336-k84  | 139111 | 0.25   | 13.01-13.96   | 0.30   | 23.10-24.80   | 1.40 | 9.03        | 0.19 | 16.58       | 0.36 | 0.61 | 0.93        | 1.41 | 0.19 | 0.38 | 0.55  | 13.80 |
| X-n344-k43  | 42050  | 0.56   | 13.74-14.75   | 0.38   | 13.19-14.16   | 0.83 | 9.24        | 0.26 | 15.64       | 0.28 | 0.58 | 0.80        | 1.35 | 0.03 | 0.33 | 0.56  | 12.67 |
| X-n351-k40  | 25896  | 0.98   | 15.32-16.44   | 0.46   | 20.49-21.99   | 1.03 | 9.43        | 0.33 | 19.27       | 0.33 | 0.67 | 1.03        | 1.36 | 0.26 | 0.45 | 0.72  | 13.06 |
| X-n359-k29  | 51505  | 1.11   | 29.73-31.91   | 0.42   | 21.21-22.77   | 0.94 | 9.64        | 0.14 | 16.80       | 0.16 | 0.48 | 0.85        | 1.51 | 0.00 | 0.24 | 0.45  | 16.30 |
| X-n367-k17  | 22814  | 0.83   | 7.96-8.55     | 0.11   | 13.37-14.36   | 0.69 | 9.86        | 0.09 | 26.26       | 0.00 | 0.19 | 0.68        | 1.65 | 0.00 | 0.04 | 0.15  | 17.03 |
| X-n376-k94  | 147713 | 0.00   | 4.32-4.63     | 0.03   | 17.20-18.47   | 0.11 | 10.10       | 0.05 | 23.28       | 0.00 | 0.01 | 0.03        | 4.17 | 0.00 | 0.01 | 0.03  | 43.35 |
| X-n384-k52  | 65940  | 0.66   | 20.97-22.51   | 0.50   | 24.44-26.23   | 0.70 | 10.32       | 0.25 | 18.84       | 0.19 | 0.46 | 0.74        | 1.71 | 0.13 | 0.27 | 0.51  | 18.01 |
| X-n393-k38  | 38260  | 0.52   | 12.64-13.57   | 0.30   | 17.39-18.66   | 0.32 | 10.56       | 0.35 | 22.11       | 0.10 | 0.29 | 0.61        | 1.41 | 0.03 | 0.12 | 0.37  | 14.97 |
| X-n401-k29  | 66187  | 0.80   | 36.72-39.41   | 0.27   | 30.09-32.30   | 0.58 | 10.78       | 0.09 | 27.64       | 0.09 | 0.22 | 0.44        | 1.98 | 0.02 | 0.10 | 0.20  | 19.96 |
| X-n411-k19  | 19712  | 1.23   | 14.47-15.53   | 0.16   | 21.09-22.64   | 1.79 | 11.05       | 0.29 | 42.48       | 0.22 | 0.52 | 1.49        | 1.82 | 0.24 | 0.37 | 0.84  | 18.87 |
| X-n420-k130 | 107798 | 0.04   | 13.49-14.49   | 0.12   | 32.34-34.71   | 0.51 | 11.29       | 0.08 | 34.84       | 0.08 | 0.25 | 0.50        | 1.16 | 0.04 | 0.14 | 0.26  | 11.29 |
| X-n429-k61  | 65467  | 0.43   | 23.22-24.93   | 0.28   | 25.23-27.08   | 0.54 | 11.53       | 0.19 | 25.46       | 0.19 | 0.39 | 0.75        | 1.40 | 0.01 | 0.19 | 0.33  | 14.55 |
| X-n439-k37  | 36391  | 0.14   | 24.07-25.84   | 0.17   | 20.97-22.51   | 0.31 | 11.80       | 0.23 | 30.62       | 0.01 | 0.09 | 0.25        | 1.64 | 0.01 | 0.02 | 0.10  | 17.74 |
| X-n449-k29  | 55254  | 1.72   | 36.41-39.09   | 0.54   | 39.45-42.35   | 0.89 | 12.07       | 0.28 | 27.64       | 0.34 | 0.62 | 1.02        | 1.46 | 0.18 | 0.34 | 0.67  | 15.14 |
| X-n459-k26  | 24145  | 1.31   | 36.84-39.54   | 0.53   | 26.02-27.93   | 0.39 | 12.34       | 0.40 | 41.10       | 0.09 | 0.31 | 0.86        | 1.57 | 0.00 | 0.21 | 0.39  | 16.51 |
| X-n469-k138 | 221824 | 0.16   | 22.07-23.69   | 0.36   | 52.70-56.57   | 0.73 | 12.61       | 0.18 | 34.91       | 0.73 | 1.07 | 1.36        | 1.62 | 0.47 | 0.64 | 0.80  | 16.03 |
| X-n480-k70  | 89449  | 0.47   | 30.64-32.89   | 0.35   | 40.73-43.72   | 0.58 | 12.90       | 0.12 | 36.73       | 0.15 | 0.36 | 0.55        | 1.63 | 0.02 | 0.21 | 0.41  | 17.09 |
| X-n491-k59  | 66487  | 1.11   | 31.73-34.06   | 0.62   | 43.71-46.92   | 1.16 | 13.20       | 0.24 | 37.39       | 0.29 | 0.53 | 0.84        | 1.40 | 0.12 | 0.32 | 0.50  | 13.88 |
| Mean        |        | 0.59   | 14.05 - 15.09 | 0.30   | 18.42 - 19.77 | 0.64 | 9.40        | 0.25 | 19.64       | 0.17 | 0.39 | 0.75        | 1.66 | 0.08 | 0.25 | 0.45  | 17.51 |

<sup>1</sup> computed by considering the range of single-thread rating of compatible CPUs.

Table 5 Computations on large-sized  $\times$  instances.

| ID          | BKS    |                 | ILS-SP |                 | HGSADC |           | KGCLS |           | SISR |           | FILO |       | FILO (long) |       |
|-------------|--------|-----------------|--------|-----------------|--------|-----------|-------|-----------|------|-----------|------|-------|-------------|-------|
|             | Avg    | $\hat{t}$       | Avg    | $\hat{t}$       | Avg    | $\hat{t}$ | Avg   | $\hat{t}$ | Avg  | $\hat{t}$ | Best | Avg   | Worst       | $t$   |
| X-n502-k39  | 69226  | 49.12-52.72     | 0.15   | 38.66-41.50     | 0.15   | 13.50     | 0.07  | 44.30     | 0.00 | 0.04      | 0.00 | 0.03  | 0.07        | 25.92 |
| X-n513-k21  | 24201  | 21.28-22.84     | 0.40   | 20.12-21.60     | 0.36   | 13.79     | 0.38  | 56.08     | 0.06 | 0.35      | 0.06 | 0.15  | 0.40        | 19.54 |
| X-n524-k153 | 154593 | 16.60-17.81     | 0.25   | 49.06-52.66     | 0.48   | 14.09     | 0.14  | 110.12    | 0.08 | 0.50      | 0.08 | 0.04  | 0.24        | 13.68 |
| X-n536-k96  | 94868  | 37.75-40.52     | 0.49   | 65.35-70.15     | 1.06   | 14.41     | 0.32  | 54.33     | 0.71 | 0.83      | 1.00 | 0.53  | 0.71        | 16.02 |
| X-n548-k50  | 86700  | 38.90-41.76     | 0.34   | 51.18-54.94     | 0.25   | 14.74     | 0.11  | 46.91     | 0.00 | 0.10      | 0.25 | 0.08  | 0.05        | 13.19 |
| X-n561-k42  | 42717  | 41.88-44.96     | 0.35   | 36.84-39.54     | 0.64   | 15.09     | 0.35  | 53.68     | 0.21 | 0.43      | 0.74 | 0.08  | 0.29        | 13.49 |
| X-n573-k30  | 50673  | 68.08-73.08     | 0.48   | 114.40-122.80   | 0.68   | 15.41     | 0.26  | 82.19     | 0.22 | 0.37      | 0.66 | 0.15  | 0.25        | 20.00 |
| X-n586-k159 | 190316 | 47.72-51.22     | 0.27   | 106.56-114.39   | 0.41   | 15.76     | 0.15  | 62.77     | 0.45 | 0.70      | 0.98 | 0.22  | 0.37        | 16.39 |
| X-n599-k92  | 108451 | 44.38-47.63     | 0.57   | 76.53-82.15     | 0.87   | 16.11     | 0.22  | 54.84     | 0.30 | 0.51      | 0.74 | 0.19  | 0.30        | 17.58 |
| X-n613-k62  | 59545  | 45.47-48.81     | 0.70   | 71.30-76.54     | 0.93   | 16.49     | 0.31  | 64.08     | 0.39 | 0.67      | 1.11 | 0.06  | 0.40        | 11.35 |
| X-n627-k43  | 62173  | 98.90-106.16    | 0.56   | 145.71-156.41   | 0.71   | 16.87     | 0.23  | 64.95     | 0.17 | 0.34      | 0.54 | 0.09  | 0.20        | 18.65 |
| X-n641-k35  | 63705  | 85.35-91.61     | 0.76   | 96.53-103.62    | 0.52   | 17.24     | 0.23  | 67.28     | 0.13 | 0.38      | 0.66 | 0.11  | 0.22        | 19.10 |
| X-n655-k131 | 106780 | 28.69-30.80     | 0.11   | 91.49-98.20     | 0.18   | 17.62     | 0.06  | 79.72     | 0.01 | 0.04      | 0.08 | 0.00  | 0.02        | 33.44 |
| X-n670-k130 | 146332 | 37.20-39.93     | 0.61   | 160.54-172.33   | 1.00   | 18.02     | 0.27  | 144.67    | 0.66 | 1.11      | 1.70 | 0.43  | 0.86        | 14.16 |
| X-n685-k75  | 68225  | 44.86-48.16     | 0.63   | 95.25-102.25    | 1.03   | 18.43     | 0.21  | 98.27     | 0.44 | 0.63      | 0.88 | 0.16  | 0.43        | 13.65 |
| X-n701-k44  | 81923  | 127.72-137.09   | 0.69   | 153.91-165.22   | 0.77   | 18.86     | 0.17  | 89.10     | 0.36 | 0.53      | 0.69 | 0.06  | 0.28        | 15.91 |
| X-n716-k35  | 43387  | 137.26-147.34   | 0.59   | 160.66-172.46   | 0.89   | 19.26     | 0.22  | 115.14    | 0.49 | 0.70      | 1.06 | 0.14  | 0.28        | 17.14 |
| X-n733-k159 | 136190 | 67.84-72.82     | 0.29   | 148.63-159.54   | 0.86   | 19.72     | 0.15  | 104.16    | 0.18 | 0.36      | 0.48 | 0.09  | 0.21        | 12.84 |
| X-n749-k98  | 73114  | 77.32-83.00     | 1.24   | 190.81-204.82   | 1.32   | 20.15     | 0.25  | 106.41    | 0.54 | 0.71      | 0.88 | 0.28  | 0.42        | 13.90 |
| X-n766-k71  | 114456 | 147.17-157.97   | 0.60   | 232.82-249.91   | 0.84   | 20.61     | 0.27  | 126.85    | 0.46 | 0.68      | 1.07 | 0.24  | 0.43        | 15.76 |
| X-n783-k48  | 72394  | 143.16-153.67   | 0.85   | 163.94-175.98   | 0.89   | 21.07     | 0.37  | 123.80    | 0.34 | 0.61      | 0.87 | 0.18  | 0.35        | 18.54 |
| X-n801-k40  | 73331  | 262.97-282.28   | 0.55   | 175.80-188.71   | 0.26   | 21.55     | 0.14  | 99.72     | 0.02 | 0.23      | 0.41 | -0.02 | 0.11        | 18.28 |
| X-n819-k171 | 158121 | 90.51-97.16     | 0.49   | 227.53-244.24   | 0.89   | 22.04     | 0.19  | 125.47    | 0.65 | 0.84      | 1.05 | 0.44  | 0.56        | 14.31 |
| X-n837-k142 | 193737 | 105.28-113.02   | 0.38   | 281.69-302.38   | 0.76   | 22.52     | 0.12  | 121.32    | 0.37 | 0.53      | 0.70 | 0.21  | 0.31        | 18.57 |
| X-n856-k95  | 88990  | 93.43-100.29    | 0.28   | 175.31-188.19   | 0.34   | 23.03     | 0.16  | 116.38    | 0.02 | 0.14      | 0.28 | -0.00 | 0.06        | 18.00 |
| X-n876-k59  | 99303  | 248.80-267.07   | 0.59   | 301.14-323.26   | 0.95   | 23.57     | 0.18  | 158.13    | 0.32 | 0.47      | 0.63 | 0.15  | 0.26        | 17.46 |
| X-n895-k37  | 53928  | 249.35-267.66   | 0.95   | 195.68-210.05   | 0.73   | 24.09     | 0.29  | 154.56    | 0.33 | 0.58      | 0.94 | 0.02  | 0.26        | 17.93 |
| X-n916-k207 | 329179 | 137.44-147.53   | 0.31   | 340.90-365.93   | 0.58   | 24.65     | 0.10  | 156.60    | 0.50 | 0.70      | 0.85 | 0.17  | 0.39        | 18.98 |
| X-n936-k151 | 132812 | 123.10-132.13   | 0.53   | 323.09-346.81   | 0.87   | 25.19     | 0.23  | 300.18    | 0.39 | 0.91      | 1.38 | 0.24  | 0.50        | 12.70 |
| X-n957-k87  | 85469  | 189.17-203.06   | 0.41   | 263.15-282.47   | 0.34   | 25.76     | 0.18  | 147.22    | 0.04 | 0.14      | 0.24 | 0.00  | 0.09        | 20.93 |
| X-n979-k58  | 118988 | 417.73-448.41   | 0.43   | 336.76-361.49   | 0.63   | 26.35     | 0.11  | 201.19    | 0.26 | 0.37      | 1.02 | 0.12  | 0.23        | 23.76 |
| X-n1001-k43 | 72369  | 481.93-517.32   | 0.81   | 333.72-358.23   | 0.95   | 26.94     | 0.22  | 206.79    | 0.41 | 0.65      | 0.83 | 0.15  | 0.33        | 16.40 |
| Mean        |        | 118.95 - 127.68 | 0.50   | 163.28 - 175.27 | 0.69   | 19.47     | 0.21  | 110.54    | 0.30 | 0.50      | 0.77 | 0.14  | 0.30        | 17.56 |

<sup>1</sup> computed by considering the range of single-thread rating of compatible CPUs.  
 New best solutions: (X-n801-k40, 73313);(X-n856-k95, 88989)

## Appendix D: Computational details for very large-scale instances

This section contains computational details associated with large-scale datasets. In particular, Figures 8 – 10 show by means of boxplots the average gaps obtained by algorithms on the  $\mathbb{B}$ ,  $\mathbb{K}$ , and  $\mathbb{Z}$  dataset, respectively. Average solution values are analyzed by conducting analyses similar to those for the  $\mathbb{X}$  dataset described in Section C. In particular, the null hypothesis  $H_0$  and the alternative hypothesis  $H_1$  are the same. However, contrarily to the previous analysis, we did not partition dataset instances in smaller groups. Thus the total number of analysis performed for each dataset is  $n = 2$ , one for each hypothesis. The initial confidence level  $\alpha_0 = 0.025$  is thus adjusted through the Bonferroni correction to  $\alpha = 0.025/2 = 0.0125$ . Tables 6 and 7 show the  $p$ -values associated with the  $\mathbb{B}$  and  $\mathbb{K}$  datasets, respectively. Finally, due to the very limited number of instances of the  $\mathbb{Z}$  dataset, the Wilcoxon signed-rank test cannot be used because it cannot give a significant result.

As can be seen from Table 6

- FILO performs better than  $\text{KGLS}^{\text{XXL}}$  and it has a performance similar to that of  $\text{KGLS}^{\text{XXL}}$  (long);
- FILO (long) performs better than  $\text{KGLS}^{\text{XXL}}$  and  $\text{KGLS}^{\text{XXL}}$  (long).

As can be seen from Table 7, both FILO and FILO (long) performs better than  $\text{KGLS}^{\text{XXL}}$  and  $\text{KGLS}^{\text{XXL}}$  (long).

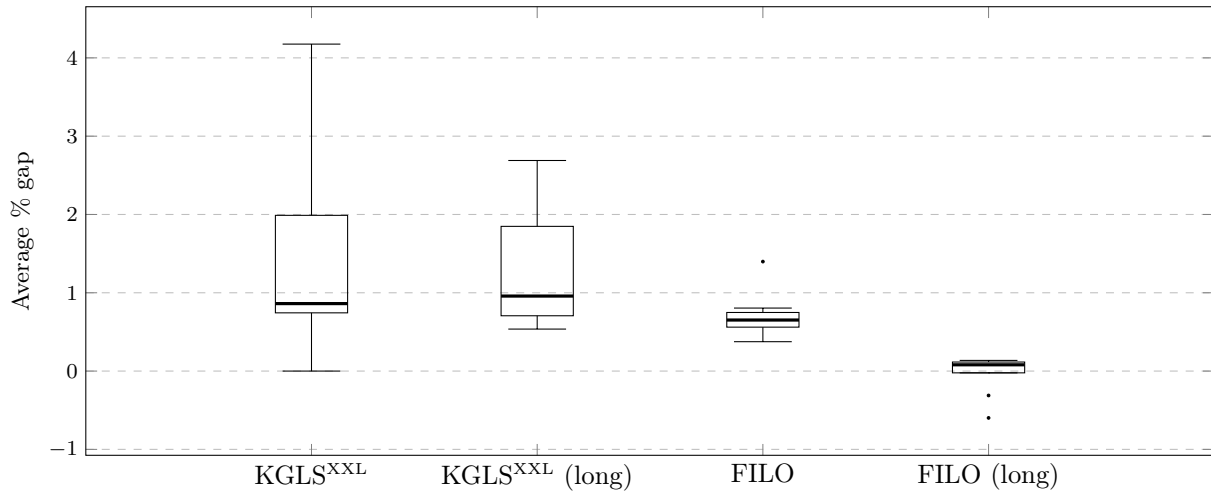

Figure 8 Comparison of average gaps obtained by algorithms on the  $\mathbb{B}$  dataset.

Table 6 Computations on the  $\mathbb{B}$  dataset:  $p$ -values for FILO on the left and for FILO (long) on the right.

|       | $\text{KGLS}^{\text{XXL}}$ | $\text{KGLS}^{\text{XXL}}$ (long) |  | $\text{KGLS}^{\text{XXL}}$ | $\text{KGLS}^{\text{XXL}}$ (long) |
|-------|----------------------------|-----------------------------------|--|----------------------------|-----------------------------------|
| $H_0$ | <b>0.001953</b>            | 0.037109                          |  | <b>0.001953</b>            | <b>0.001953</b>                   |
| $H_1$ | <b>0.000977</b>            | 0.018555                          |  | <b>0.000977</b>            | <b>0.000977</b>                   |
|       | Better                     | Similar                           |  | Better                     | Better                            |

$p$ -values in bold are associated with rejected hypothesis when  $\alpha = 0.0125$ .

The last row contains a  $p$ -value interpretation when  $\alpha = 0.0125$ . In particular, FILO is not statistically different from the competing method when  $H_0$  cannot be rejected (Similar), FILO is statistically better when both  $H_0$  and  $H_1$  are rejected (Better), and, finally, FILO is statistically worse when  $H_0$  is rejected and  $H_1$  is not rejected (Worse).

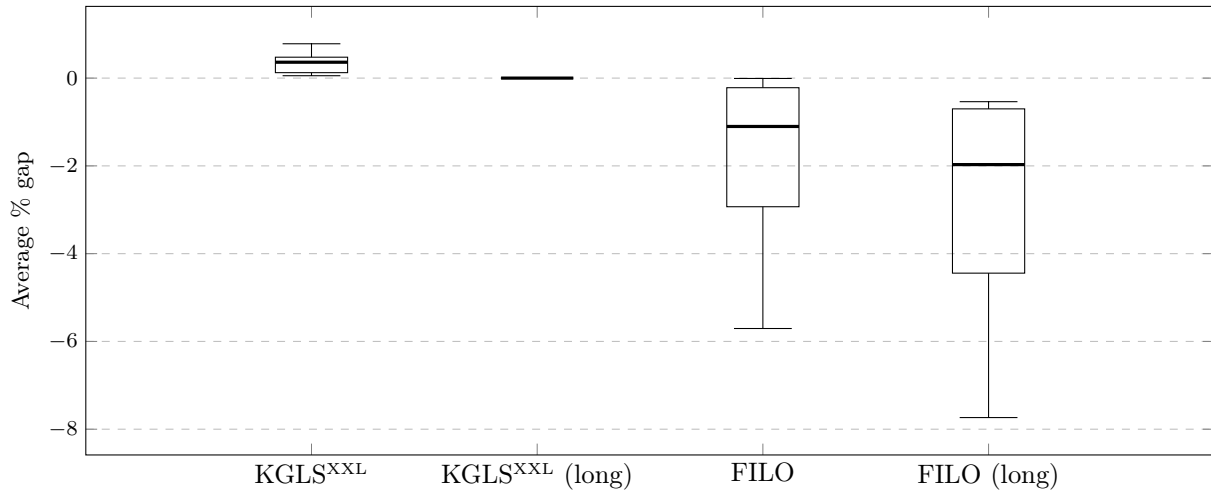

Figure 9 Comparison of average gaps obtained by algorithms on the  $\mathbb{K}$  dataset.

Table 7 Computations on the  $\mathbb{K}$  dataset:  $p$ -values for FILO on the left and for FILO (long) on the right.

|       | KGLS <sup>XXL</sup> | KGLS <sup>XXL</sup> (long) |  | KGLS <sup>XXL</sup> | KGLS <sup>XXL</sup> (long) |
|-------|---------------------|----------------------------|--|---------------------|----------------------------|
| $H_0$ | <b>0.0078125</b>    | <b>0.0078125</b>           |  | <b>0.0078125</b>    | <b>0.0078125</b>           |
| $H_1$ | <b>0.00390625</b>   | <b>0.00390625</b>          |  | <b>0.00390625</b>   | <b>0.00390625</b>          |
|       | Better              | Better                     |  | Better              | Better                     |

$p$ -values in bold are associated with rejected hypothesis when  $\alpha = 0.0125$ . The last row contains a  $p$ -value interpretation when  $\alpha = 0.0125$ . In particular, FILO is not statistically different from the competing method when  $H_0$  cannot be rejected (Similar), FILO is statistically better when both  $H_0$  and  $H_1$  are rejected (Better), and, finally, FILO is statistically worse when  $H_0$  is rejected and  $H_1$  is not rejected (Worse).

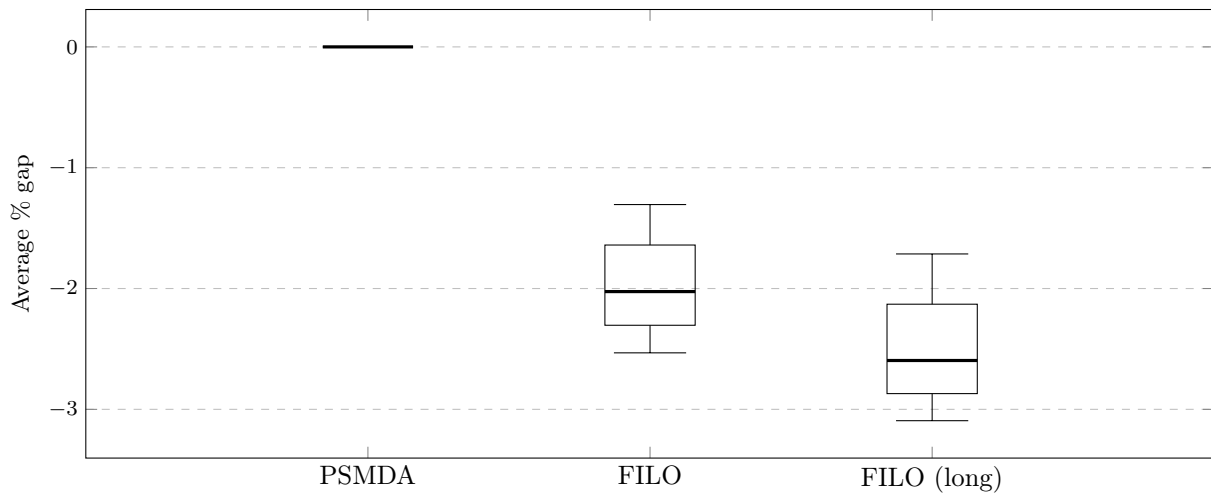

Figure 10 Comparison of average gaps obtained by algorithms on the  $\mathbb{Z}$  dataset.

## References

- Arnold F, Gendreau M, Sörensen K, 2019 *Efficiently solving very large-scale routing problems*. *Computers & Operations Research* 107:32 – 42, URL <http://dx.doi.org/10.1016/j.cor.2019.03.006>.
- Christiaens J, Vanden Berghe G, 2020 *Slack induction by string removals for vehicle routing problems*. *Transportation Science* 54(2):417–433, URL <http://dx.doi.org/10.1287/trsc.2019.0914>.
- Dunn OJ, 1961 *Multiple comparisons among means*. *Journal of the American Statistical Association* 56(293):52–64, URL <http://www.jstor.org/stable/2282330>.
- Wilcoxon F, 1945 *Individual comparisons by ranking methods*. *Biometrics Bulletin* 1(6):80–83, URL <http://www.jstor.org/stable/3001968>.
